# Supplementary material
Source: publisher figshare collection journal article supplement (https://acs.figshare.com/ndownloader/files/5712795)
Supplement: Supplementary file 1 [file 5712795]

# ic981266y.cif

data_global

_publ_contact_author
;
        Matti Haukka
        Department of Chemistry
        University of Joensuu
        PO Box 111, FIN-80101
        Finland
;
_publ_contact_author_phone      '358-13-2513345'
_publ_contact_author_fax        '358-13-2513344'
_publ_contact_author_email      'matti.haukka@joensuu.fi'

_publ_requested_journal         'Inorganic Chemistry'
_publ_requested_coeditor_name   'Prof. A. Haim'

_publ_section_title
;
Reactions of Ruthenium Bipyridine Catalyst Precursors: Synthetic, Structural,
and Theoretical Studies on Ruthenium Mono(bipyridine) Carbonyls in Ethylene
Glycol Solutions (Manuscript ID: IC981266Y)
;

loop_
_publ_author_name
_publ_author_address
;
        'Matti Haukka'
        Department of Chemistry
        University of Joensuu
        P.O. Box 111, FIN-80101
        Finland
;
        'Pipsa Hirva'
        Department of Chemistry
        University of Joensuu
        P.O. Box 111, FIN-80101
        Finland
;
        'Saija Luukkanen'
        Department of Chemistry
        University of Joensuu
        P.O. Box 111, FIN-80101
        Finland
;
        'Mirja Kallinen'
        Department of Chemistry
        University of Joensuu
        P.O. Box 111, FIN-80101
        Finland
;
        'Markku Ahlgren'
        Department of Chemistry
        University of Joensuu
        P.O. Box 111, FIN-80101
        Finland
;
        'Tapani Pakkanen'
        Department of Chemistry
        University of Joensuu
        PO Box 111, FIN-80101
        Finland
;

_publ_section_abstract
;
Carbonyl-containing ruthenium mono(bipyridines) are effective catalysts
or catalyst precursors in processes such as the water-gas shift reaction.
Ethylene glycol solutions provide versatile solvent systems for synthesizing
the mono(bipyridines) from [Ru(CO)3Cl2]2 and 2,2'-bipyridine. These starting
compounds were used here in the preparation of three primary products,
Ru(bpy)(CO)2Cl(C(O)OCH2CH2OH), Ru(bpy)(CO)2ClH, and [Ru(bpy)(CO)2Cl]2,
which were formed consecutively and isolated by adjusting the reaction
conditions. Reactions were studied by analyzing the solid products and
monitoring the evolution of gases in each reaction step. Computational
non-local density functional methods were applied  to estimate the total
reaction energies and to study isomerism of the compounds. Ethylene glycol
solvent plays an active role in the synthesis reactions. It provides a
reactive alkoxy group, -OCH2CH2OH, which is able to act as a nucleophile
attacking the carbon of a Ru-CO group. The first product, Ru(bpy)(CO)2Cl
(C(O)OCH2CH2OH), is formed under mild conditions at room temperature. The
alkoxy carbonyl complex reacts further to Ru(bpy)(CO)2ClH and CO2 when heated.
Formation of the hydride complex requires the presence of water.
Ru(bpy)(CO)2ClH can be further converted to dimeric [Ru(bpy)(CO)2Cl]2.
Ru(bpy)(CO)2Cl2 is a side product which is also obtained from [Ru(CO)3Cl2]2
and 2,2'-bipyridine. Crystal data: Ru(bpy)(CO)2Cl(C(O)OCH2CH2OH)
(1/4(HOCH2CH2OH) (1), space group, C2/c, cell constants: a=27.889(3) �,
b=10.270(2) �, c=26.563(2) �, alpha=112.01(3)�, V=7053.7(17) �3, Z=16.
Ru(bpy)(CO)2Cl2 (2), P-1, a=6.3871(10) �, b=8.132(2) �, c=12.693(3) �,
alpha=89.20(3)�, beta=81.37(3)�, gamma=81.20(3)�, V=644.2(2) �3, Z=2.
[Ru(bpy)(CO)3Cl][Cl] ((H5O2)(Cl) (3), Pbcn, a=20.856(4) �, b=13.523(3) �,
c=13.203(3) �, V=3723.7(14) �3, Z=8.
;

data_Ru(bpy)(CO)2Cl(C(O)OCH2CH2OH).1/4(HOCH2CH2OH)
 
_audit_creation_method            SHELXL-97 
_chemical_name_systematic 
; 
 ? 
; 
_chemical_name_common             'Ru(bpy)(CO)2Cl(C(O)OCH2CH2OH)
                                  .1/4(HOCH2CH2OH)'
_chemical_melting_point           ? 
_chemical_formula_moiety          ? 
_chemical_formula_sum 
 'C15.50 H14.50 Cl N2 O5.50 Ru' 
_chemical_formula_weight          453.31 
 
loop_ 
 _atom_type_symbol 
 _atom_type_description 
 _atom_type_scat_dispersion_real 
 _atom_type_scat_dispersion_imag 
 _atom_type_scat_source 
 'C'  'C'   0.0033   0.0016 
 'International Tables Vol C Tables 4.2.6.8 and 6.1.1.4' 
 'H'  'H'   0.0000   0.0000 
 'International Tables Vol C Tables 4.2.6.8 and 6.1.1.4' 
 'N'  'N'   0.0061   0.0033 
 'International Tables Vol C Tables 4.2.6.8 and 6.1.1.4' 
 'O'  'O'   0.0106   0.0060 
 'International Tables Vol C Tables 4.2.6.8 and 6.1.1.4' 
 'Cl'  'Cl'   0.1484   0.1585 
 'International Tables Vol C Tables 4.2.6.8 and 6.1.1.4' 
 'Ru'  'Ru'  -1.2594   0.8363 
 'International Tables Vol C Tables 4.2.6.8 and 6.1.1.4' 
 
_symmetry_cell_setting            Monoclinic 
_symmetry_space_group_name_H-M    C2/c 
 
loop_ 
 _symmetry_equiv_pos_as_xyz 
 'x, y, z' 
 '-x, y, -z+1/2' 
 'x+1/2, y+1/2, z' 
 '-x+1/2, y+1/2, -z+1/2' 
 '-x, -y, -z' 
 'x, -y, z-1/2' 
 '-x+1/2, -y+1/2, -z' 
 'x+1/2, -y+1/2, z-1/2' 
 
_cell_length_a                    27.889(3) 
_cell_length_b                    10.270(2) 
_cell_length_c                    26.563(2) 
_cell_angle_alpha                 90.00 
_cell_angle_beta                  112.01(3) 
_cell_angle_gamma                 90.00 
_cell_volume                      7053.7(17) 
_cell_formula_units_Z             16 
_cell_measurement_temperature     293(2) 
_cell_measurement_reflns_used     ? 
_cell_measurement_theta_min       ? 
_cell_measurement_theta_max       ? 
 
_exptl_crystal_description        'Irregular' 
_exptl_crystal_colour             'Pale yellow (nearly colourless)' 
_exptl_crystal_size_max           0.3 
_exptl_crystal_size_mid           0.2 
_exptl_crystal_size_min           0.05 
_exptl_crystal_density_meas       ? 
_exptl_crystal_density_diffrn     1.707 
_exptl_crystal_density_method     'not measured' 
_exptl_crystal_F_000              3624 
_exptl_absorpt_coefficient_mu     1.071 
_exptl_absorpt_correction_type    ? 
_exptl_absorpt_correction_T_min   ? 
_exptl_absorpt_correction_T_max   ? 
_exptl_absorpt_process_details    ? 
 
_exptl_special_details 
; 
 ? 
; 
 
_diffrn_ambient_temperature       293(2) 
_diffrn_radiation_wavelength      0.71073 
_diffrn_radiation_type            MoK\a 
_diffrn_radiation_source          'fine-focus sealed tube' 
_diffrn_radiation_monochromator   graphite 
_diffrn_measurement_device_type   'Nonius Kappa CCD' 
_diffrn_measurement_method        'phi/omega-scans' 
_diffrn_detector_area_resol_mean  ? 
_diffrn_standards_number          ? 
_diffrn_standards_interval_count  ? 
_diffrn_standards_interval_time   ? 
_diffrn_standards_decay_%         ? 
_diffrn_reflns_number             25676 
_diffrn_reflns_av_R_equivalents   0.0555 
_diffrn_reflns_av_sigmaI/netI     0.0816 
_diffrn_reflns_limit_h_min        -33 
_diffrn_reflns_limit_h_max        33 
_diffrn_reflns_limit_k_min        -11 
_diffrn_reflns_limit_k_max        12 
_diffrn_reflns_limit_l_min        -31 
_diffrn_reflns_limit_l_max        31 
_diffrn_reflns_theta_min          2.88 
_diffrn_reflns_theta_max          25.00 
_reflns_number_total              6204 
_reflns_number_gt                 3798 
_reflns_threshold_expression      >2sigma(I) 
 
_computing_data_collection        'kcd (Nonius B.V., 1997)' 
_computing_cell_refinement        'Denzo/Scalepack (Otwinowski, Minor, 1997)'   
_computing_data_reduction         'Denzo/Scalepack (Otwinowski, Minor, 1997)'   
_computing_structure_solution     'SHELXS-97 (Sheldrick, 1990)' 
_computing_structure_refinement   'SHELXL-97 (Sheldrick, 1997)' 
_computing_molecular_graphics     ? 
_computing_publication_material   SHELXL-97 
 
_refine_special_details 
; 
 Refinement of F^2^ against ALL reflections.  The weighted R-factor wR and 
 goodness of fit S are based on F^2^, conventional R-factors R are based 
 on F, with F set to zero for negative F^2^. The threshold expression of 
 F^2^ > 2sigma(F^2^) is used only for calculating R-factors(gt) etc. and is 
 not relevant to the choice of reflections for refinement.  R-factors based 
 on F^2^ are statistically about twice as large as those based on F, and R- 
 factors based on ALL data will be even larger. 
; 
 
_refine_ls_structure_factor_coef  Fsqd  
_refine_ls_matrix_type            full 
_refine_ls_weighting_scheme       calc  
_refine_ls_weighting_details 
 'calc w=1/[\s^2^(Fo^2^)+(0.0059P)^2^+0.0000P] where P=(Fo^2^+2Fc^2^)/3' 
_atom_sites_solution_primary      direct 
_atom_sites_solution_secondary    difmap 
_atom_sites_solution_hydrogens    geom 
_refine_ls_hydrogen_treatment     mixed 
_refine_ls_extinction_method      SHELXL 
_refine_ls_extinction_coef        0.000033(14) 
_refine_ls_extinction_expression 
 'Fc^*^=kFc[1+0.001xFc^2^\l^3^/sin(2\q)]^-1/4^' 
_refine_ls_number_reflns          6204 
_refine_ls_number_parameters      454 
_refine_ls_number_restraints      0 
_refine_ls_R_factor_all           0.0560 
_refine_ls_R_factor_gt            0.0275 
_refine_ls_wR_factor_ref          0.0489 
_refine_ls_wR_factor_gt           0.0464 
_refine_ls_goodness_of_fit_ref    0.773 
_refine_ls_restrained_S_all       0.773 
_refine_ls_shift/su_max           0.001 
_refine_ls_shift/su_mean          0.000 
 
loop_ 
 _atom_site_label 
 _atom_site_type_symbol 
 _atom_site_fract_x 
 _atom_site_fract_y 
 _atom_site_fract_z 
 _atom_site_U_iso_or_equiv 
 _atom_site_adp_type 
 _atom_site_occupancy 
 _atom_site_symmetry_multiplicity 
 _atom_site_calc_flag 
 _atom_site_refinement_flags 
 _atom_site_disorder_assembly 
 _atom_site_disorder_group 
Ru Ru 0.373497(9) 0.79127(3) -0.104580(12) 0.04115(9) Uani 1 1 d . . . 
Cl1 Cl 0.36807(3) 1.03486(8) -0.10252(4) 0.0498(2) Uani 1 1 d . . . 
C1 C 0.33414(13) 0.7761(3) -0.17904(16) 0.0547(10) Uani 1 1 d . . . 
O1 O 0.30997(10) 0.7637(2) -0.22378(11) 0.0855(9) Uani 1 1 d . . . 
C2 C 0.31275(12) 0.7620(3) -0.09202(15) 0.0542(11) Uani 1 1 d . . . 
O2 O 0.27615(9) 0.7431(3) -0.08375(12) 0.0885(10) Uani 1 1 d . . . 
N1 N 0.42234(9) 0.8032(2) -0.02158(11) 0.0412(7) Uani 1 1 d . . . 
N2 N 0.44736(10) 0.8185(2) -0.10842(14) 0.0507(8) Uani 1 1 d . . . 
C10 C 0.40692(13) 0.7988(3) 0.02025(16) 0.0540(10) Uani 1 1 d . . . 
H10 H 0.3718 0.7907 0.0133 0.065 Uiso 1 1 calc R . . 
C11 C 0.44105(17) 0.8058(3) 0.07332(17) 0.0722(12) Uani 1 1 d . . . 
H11 H 0.4293 0.8030 0.1018 0.087 Uiso 1 1 calc R . . 
C12 C 0.49241(18) 0.8168(4) 0.08310(19) 0.0806(14) Uani 1 1 d . . . 
H12 H 0.5161 0.8207 0.1187 0.097 Uiso 1 1 calc R . . 
C13 C 0.50939(14) 0.8221(3) 0.04127(19) 0.0663(12) Uani 1 1 d . . . 
H13 H 0.5445 0.8295 0.0480 0.080 Uiso 1 1 calc R . . 
C14 C 0.47333(12) 0.8163(3) -0.01159(16) 0.0473(10) Uani 1 1 d . . . 
C15 C 0.48701(13) 0.8265(3) -0.05928(18) 0.0520(11) Uani 1 1 d . . . 
C16 C 0.53750(14) 0.8486(3) -0.0565(2) 0.0790(15) Uani 1 1 d . . . 
H16 H 0.5645 0.8581 -0.0230 0.095 Uiso 1 1 calc R . . 
C17 C 0.5467(2) 0.8560(4) -0.1038(3) 0.102(2) Uani 1 1 d . . . 
H17 H 0.5803 0.8673 -0.1024 0.122 Uiso 1 1 calc R . . 
C18 C 0.5066(2) 0.8467(4) -0.1529(2) 0.0911(17) Uani 1 1 d . . . 
H18 H 0.5124 0.8531 -0.1850 0.109 Uiso 1 1 calc R . . 
C19 C 0.45702(16) 0.8276(3) -0.15392(19) 0.0725(13) Uani 1 1 d . . . 
H19 H 0.4297 0.8210 -0.1873 0.087 Uiso 1 1 calc R . . 
C5 C 0.38613(12) 0.5949(3) -0.10231(13) 0.0389(9) Uani 1 1 d . . . 
O51 O 0.42506(8) 0.5401(2) -0.07873(9) 0.0522(6) Uani 1 1 d . . . 
O52 O 0.34295(8) 0.5269(2) -0.13308(10) 0.0650(7) Uani 1 1 d . . . 
C51 C 0.34798(12) 0.3860(3) -0.13757(15) 0.0590(11) Uani 1 1 d . . . 
H51B H 0.3643 0.3473 -0.1019 0.071 Uiso 1 1 calc R . . 
H51A H 0.3688 0.3664 -0.1588 0.071 Uiso 1 1 calc R . . 
C52 C 0.29408(12) 0.3343(3) -0.16527(14) 0.0507(10) Uani 1 1 d . . . 
H52A H 0.2767 0.3822 -0.1986 0.061 Uiso 1 1 calc R . . 
H52B H 0.2956 0.2434 -0.1745 0.061 Uiso 1 1 calc R . . 
O53 O 0.26606(9) 0.3464(2) -0.13110(11) 0.0832(9) Uani 1 1 d . . . 
H53 H 0.2858 0.3385 -0.0994 0.125 Uiso 1 1 calc R . . 
RuB Ru 0.345292(9) 0.46441(3) 0.160806(11) 0.03790(9) Uani 1 1 d . . . 
Cl1B Cl 0.35343(3) 0.22069(8) 0.16381(4) 0.0578(3) Uani 1 1 d . . . 
C1B C 0.39572(13) 0.4754(4) 0.23074(16) 0.0563(10) Uani 1 1 d . . . 
O1B O 0.42616(10) 0.4764(3) 0.27405(12) 0.1051(11) Uani 1 1 d . . . 
C2B C 0.29553(12) 0.4768(3) 0.19183(14) 0.0438(9) Uani 1 1 d . . . 
O2B O 0.26427(9) 0.4898(2) 0.20977(10) 0.0666(8) Uani 1 1 d . . . 
N1B N 0.29238(9) 0.4466(2) 0.08036(10) 0.0384(7) Uani 1 1 d . . . 
N2B N 0.39369(9) 0.4643(2) 0.11593(11) 0.0379(6) Uani 1 1 d . . . 
C10B C 0.24062(12) 0.4343(3) 0.06481(15) 0.0507(10) Uani 1 1 d . . . 
H10B H 0.2264 0.4312 0.0914 0.061 Uiso 1 1 calc R . . 
C11B C 0.20811(13) 0.4262(4) 0.01119(17) 0.0661(12) Uani 1 1 d . . . 
H11B H 0.1725 0.4197 0.0017 0.079 Uiso 1 1 calc R . . 
C12B C 0.22886(15) 0.4276(4) -0.02821(17) 0.0763(13) Uani 1 1 d . . . 
H12B H 0.2076 0.4217 -0.0647 0.092 Uiso 1 1 calc R . . 
C13B C 0.28200(13) 0.4381(3) -0.01255(15) 0.0620(11) Uani 1 1 d . . . 
H13B H 0.2969 0.4388 -0.0386 0.074 Uiso 1 1 calc R . . 
C14B C 0.31256(11) 0.4476(3) 0.04164(13) 0.0404(8) Uani 1 1 d . . . 
C15B C 0.36961(11) 0.4581(3) 0.06166(14) 0.0390(8) Uani 1 1 d . . . 
C16B C 0.39701(12) 0.4623(3) 0.02781(14) 0.0493(9) Uani 1 1 d . . . 
H16B H 0.3798 0.4565 -0.0096 0.059 Uiso 1 1 calc R . . 
C17B C 0.45017(14) 0.4752(3) 0.04990(17) 0.0579(10) Uani 1 1 d . . . 
H17B H 0.4691 0.4781 0.0276 0.070 Uiso 1 1 calc R . . 
C18B C 0.47453(13) 0.4835(3) 0.10484(17) 0.0552(10) Uani 1 1 d . . . 
H18B H 0.5102 0.4938 0.1205 0.066 Uiso 1 1 calc R . . 
C19B C 0.44554(12) 0.4764(3) 0.13681(15) 0.0477(9) Uani 1 1 d . . . 
H19B H 0.4624 0.4801 0.1743 0.057 Uiso 1 1 calc R . . 
C5B C 0.34314(11) 0.6621(3) 0.15100(16) 0.0431(9) Uani 1 1 d . . . 
O51B O 0.34729(9) 0.7201(2) 0.11356(10) 0.0601(7) Uani 1 1 d . . . 
O52B O 0.33602(8) 0.7285(2) 0.19205(10) 0.0583(7) Uani 1 1 d . . . 
C51B C 0.33336(14) 0.8703(3) 0.18710(16) 0.0615(11) Uani 1 1 d . . . 
H51C H 0.3034 0.8963 0.1557 0.074 Uiso 1 1 calc R . . 
H51D H 0.3642 0.9041 0.1831 0.074 Uiso 1 1 calc R . . 
C52B C 0.32921(16) 0.9197(4) 0.23743(18) 0.0779(13) Uani 1 1 d . . . 
H52C H 0.3216 1.0122 0.2338 0.094 Uiso 1 1 calc R . . 
H52D H 0.3011 0.8758 0.2435 0.094 Uiso 1 1 calc R . . 
O53B O 0.37627(12) 0.8981(3) 0.28254(12) 0.1000(10) Uani 1 1 d . . . 
H53B H 0.3737 0.9275 0.3101 0.150 Uiso 1 1 calc R . . 
C9A C 0.0210(4) 0.3358(14) 0.2636(6) 0.123(5) Uiso 0.50 1 d P . . 
C9B C -0.0238(5) 0.2521(14) 0.2484(7) 0.156(6) Uiso 0.50 1 d P . . 
O9A O 0.0375(3) 0.2389(11) 0.2154(5) 0.106(3) Uiso 0.33 1 d P . . 
O9B O 0.0315(4) 0.4512(13) 0.2444(6) 0.166(5) Uiso 0.33 1 d P . . 
O9C O 0.0318(5) 0.3490(17) 0.2132(6) 0.166(5) Uiso 0.33 1 d P . . 
 
loop_ 
 _atom_site_aniso_label 
 _atom_site_aniso_U_11 
 _atom_site_aniso_U_22 
 _atom_site_aniso_U_33 
 _atom_site_aniso_U_23 
 _atom_site_aniso_U_13 
 _atom_site_aniso_U_12 
Ru 0.03438(15) 0.03791(17) 0.0482(2) 0.00207(15) 0.01201(13) -0.00111(14) 
Cl1 0.0452(5) 0.0395(5) 0.0622(7) 0.0013(5) 0.0173(4) -0.0002(4) 
C1 0.066(2) 0.040(2) 0.048(3) 0.005(2) 0.010(2) 0.0002(19) 
O1 0.112(2) 0.066(2) 0.055(2) 0.0032(16) 0.0030(17) -0.0041(17) 
C2 0.0352(19) 0.047(2) 0.074(3) -0.0044(19) 0.0122(19) 0.0025(18) 
O2 0.0478(15) 0.090(2) 0.138(3) -0.0110(18) 0.0460(17) -0.0102(15) 
N1 0.0364(15) 0.0318(16) 0.053(2) 0.0016(14) 0.0142(14) -0.0007(13) 
N2 0.0556(19) 0.0355(18) 0.073(3) 0.0055(16) 0.0382(19) 0.0006(14) 
C10 0.062(2) 0.045(2) 0.054(3) 0.000(2) 0.021(2) -0.0032(19) 
C11 0.102(3) 0.055(3) 0.054(3) -0.001(2) 0.023(3) -0.012(3) 
C12 0.086(3) 0.064(3) 0.063(4) -0.002(2) -0.005(3) -0.011(3) 
C13 0.044(2) 0.056(3) 0.082(4) -0.003(2) 0.005(2) -0.0070(19) 
C14 0.040(2) 0.029(2) 0.066(3) 0.0003(18) 0.012(2) -0.0016(16) 
C15 0.039(2) 0.030(2) 0.091(4) -0.002(2) 0.028(2) -0.0006(16) 
C16 0.046(2) 0.051(3) 0.145(5) -0.004(3) 0.041(3) -0.004(2) 
C17 0.099(4) 0.058(3) 0.199(7) 0.000(4) 0.114(5) -0.002(3) 
C18 0.124(4) 0.067(3) 0.125(5) 0.013(3) 0.096(4) 0.002(3) 
C19 0.087(3) 0.059(3) 0.098(4) 0.011(2) 0.066(3) 0.004(2) 
C5 0.040(2) 0.043(2) 0.036(2) -0.0017(17) 0.0167(17) -0.0054(17) 
O51 0.0401(13) 0.0480(15) 0.0658(18) 0.0032(13) 0.0169(12) 0.0037(12) 
O52 0.0464(14) 0.0336(14) 0.094(2) -0.0007(14) 0.0022(13) 0.0010(12) 
C51 0.058(2) 0.037(2) 0.080(3) 0.000(2) 0.024(2) 0.0010(19) 
C52 0.056(2) 0.046(2) 0.047(3) -0.0061(18) 0.0161(19) -0.0074(18) 
O53 0.087(2) 0.107(2) 0.063(2) -0.0133(16) 0.0384(17) -0.0165(16) 
RuB 0.03792(15) 0.04067(17) 0.03677(18) -0.00238(15) 0.01589(13) 0.00003(14) 
Cl1B 0.0653(6) 0.0435(5) 0.0729(7) 0.0018(5) 0.0354(5) 0.0024(5) 
C1B 0.052(2) 0.062(3) 0.053(3) -0.004(2) 0.018(2) 0.001(2) 
O1B 0.087(2) 0.144(3) 0.055(2) -0.004(2) -0.0065(17) 0.003(2) 
C2B 0.048(2) 0.045(2) 0.040(2) -0.0011(18) 0.0180(17) -0.0024(18) 
O2B 0.0681(17) 0.078(2) 0.071(2) -0.0104(15) 0.0461(15) -0.0054(14) 
N1B 0.0332(14) 0.0421(17) 0.0396(18) -0.0050(14) 0.0134(13) -0.0028(13) 
N2B 0.0358(14) 0.0369(16) 0.0437(19) -0.0010(14) 0.0180(13) 0.0006(14) 
C10B 0.047(2) 0.052(2) 0.055(3) -0.0045(19) 0.0209(19) -0.0054(18) 
C11B 0.044(2) 0.083(3) 0.062(3) -0.014(2) 0.009(2) -0.007(2) 
C12B 0.065(3) 0.103(4) 0.042(3) -0.008(2) 0.000(2) -0.006(2) 
C13B 0.057(2) 0.084(3) 0.046(3) -0.009(2) 0.021(2) -0.005(2) 
C14B 0.0447(19) 0.044(2) 0.034(2) -0.0048(17) 0.0156(17) -0.0011(17) 
C15B 0.0453(19) 0.036(2) 0.040(2) 0.0029(18) 0.0206(17) 0.0036(16) 
C16B 0.053(2) 0.053(2) 0.049(2) 0.006(2) 0.0273(19) 0.001(2) 
C17B 0.064(3) 0.054(2) 0.079(3) 0.009(2) 0.053(2) 0.009(2) 
C18B 0.047(2) 0.057(3) 0.075(3) 0.009(2) 0.038(2) 0.0051(19) 
C19B 0.0414(19) 0.048(2) 0.053(2) 0.0037(19) 0.0163(18) 0.0037(18) 
C5B 0.0368(19) 0.047(2) 0.045(3) -0.009(2) 0.0141(18) -0.0013(17) 
O51B 0.0805(17) 0.0516(16) 0.0613(19) 0.0045(14) 0.0415(15) 0.0018(14) 
O52B 0.0868(17) 0.0402(15) 0.0563(18) -0.0049(13) 0.0364(14) -0.0013(13) 
C51B 0.086(3) 0.037(2) 0.070(3) -0.008(2) 0.039(2) -0.003(2) 
C52B 0.114(4) 0.055(3) 0.077(4) -0.012(2) 0.050(3) 0.001(3) 
O53B 0.129(2) 0.110(3) 0.068(2) -0.0341(19) 0.045(2) -0.015(2) 
 
_geom_special_details 
; 
 All esds (except the esd in the dihedral angle between two l.s. planes) 
 are estimated using the full covariance matrix.  The cell esds are taken 
 into account individually in the estimation of esds in distances, angles 
 and torsion angles; correlations between esds in cell parameters are only 
 used when they are defined by crystal symmetry.  An approximate (isotropic) 
 treatment of cell esds is used for estimating esds involving l.s. planes. 
; 
 
loop_ 
 _geom_bond_atom_site_label_1 
 _geom_bond_atom_site_label_2 
 _geom_bond_distance 
 _geom_bond_site_symmetry_2 
 _geom_bond_publ_flag 
Ru C2 1.870(4) . ? 
Ru C1 1.875(4) . ? 
Ru C5 2.045(3) . ? 
Ru N1 2.117(3) . ? 
Ru N2 2.119(3) . ? 
Ru Cl1 2.5081(10) . ? 
C1 O1 1.132(4) . ? 
C2 O2 1.138(3) . ? 
N1 C10 1.334(4) . ? 
N1 C14 1.352(3) . ? 
N2 C19 1.336(4) . ? 
N2 C15 1.361(4) . ? 
C10 C11 1.376(5) . ? 
C10 H10 0.9300 . ? 
C11 C12 1.361(5) . ? 
C11 H11 0.9300 . ? 
C12 C13 1.363(5) . ? 
C12 H12 0.9300 . ? 
C13 C14 1.388(5) . ? 
C13 H13 0.9300 . ? 
C14 C15 1.457(5) . ? 
C15 C16 1.401(4) . ? 
C16 C17 1.377(6) . ? 
C16 H16 0.9300 . ? 
C17 C18 1.366(6) . ? 
C17 H17 0.9300 . ? 
C18 C19 1.386(5) . ? 
C18 H18 0.9300 . ? 
C19 H19 0.9300 . ? 
C5 O51 1.174(3) . ? 
C5 O52 1.366(3) . ? 
O52 C51 1.463(3) . ? 
C51 C52 1.501(4) . ? 
C51 H51B 0.9700 . ? 
C51 H51A 0.9700 . ? 
C52 O53 1.408(4) . ? 
C52 H52A 0.9700 . ? 
C52 H52B 0.9700 . ? 
O53 H53 0.8200 . ? 
RuB C2B 1.865(4) . ? 
RuB C1B 1.866(4) . ? 
RuB C5B 2.045(3) . ? 
RuB N1B 2.101(3) . ? 
RuB N2B 2.109(2) . ? 
RuB Cl1B 2.5118(10) . ? 
C1B O1B 1.146(4) . ? 
C2B O2B 1.147(3) . ? 
N1B C14B 1.345(4) . ? 
N1B C10B 1.350(3) . ? 
N2B C15B 1.344(4) . ? 
N2B C19B 1.346(3) . ? 
C10B C11B 1.375(4) . ? 
C10B H10B 0.9300 . ? 
C11B C12B 1.373(5) . ? 
C11B H11B 0.9300 . ? 
C12B C13B 1.385(4) . ? 
C12B H12B 0.9300 . ? 
C13B C14B 1.374(4) . ? 
C13B H13B 0.9300 . ? 
C14B C15B 1.480(4) . ? 
C15B C16B 1.382(4) . ? 
C16B C17B 1.381(4) . ? 
C16B H16B 0.9300 . ? 
C17B C18B 1.362(4) . ? 
C17B H17B 0.9300 . ? 
C18B C19B 1.376(4) . ? 
C18B H18B 0.9300 . ? 
C19B H19B 0.9300 . ? 
C5B O51B 1.202(4) . ? 
C5B O52B 1.362(4) . ? 
O52B C51B 1.461(3) . ? 
C51B C52B 1.475(5) . ? 
C51B H51C 0.9700 . ? 
C51B H51D 0.9700 . ? 
C52B O53B 1.424(4) . ? 
C52B H52C 0.9700 . ? 
C52B H52D 0.9700 . ? 
O53B H53B 0.8200 . ? 
C9A C9B 0.930(16) 2 ? 
C9A C9A 1.12(2) 2 ? 
C9A O9B 1.365(15) . ? 
C9A C9B 1.445(12) . ? 
C9A O9C 1.484(18) . ? 
C9A O9C 1.80(2) 2 ? 
C9A O9A 1.812(18) . ? 
C9A O9B 1.835(14) 2 ? 
C9B C9A 0.930(16) 2 ? 
C9B O9A 1.169(17) 2 ? 
C9B C9B 1.30(3) 2 ? 
C9B O9C 1.501(19) 2 ? 
O9A O9C 1.140(15) . ? 
O9A C9B 1.169(17) 2 ? 
O9B O9C 1.339(17) . ? 
O9B C9A 1.835(14) 2 ? 
O9C C9B 1.501(19) 2 ? 
O9C C9A 1.80(2) 2 ? 
 
loop_ 
 _geom_angle_atom_site_label_1 
 _geom_angle_atom_site_label_2 
 _geom_angle_atom_site_label_3 
 _geom_angle 
 _geom_angle_site_symmetry_1 
 _geom_angle_site_symmetry_3 
 _geom_angle_publ_flag 
C2 Ru C1 87.90(15) . . ? 
C2 Ru C5 89.65(13) . . ? 
C1 Ru C5 88.58(14) . . ? 
C2 Ru N1 95.50(13) . . ? 
C1 Ru N1 176.04(14) . . ? 
C5 Ru N1 89.41(11) . . ? 
C2 Ru N2 172.81(14) . . ? 
C1 Ru N2 98.96(15) . . ? 
C5 Ru N2 88.39(11) . . ? 
N1 Ru N2 77.57(12) . . ? 
C2 Ru Cl1 95.17(10) . . ? 
C1 Ru Cl1 95.16(10) . . ? 
C5 Ru Cl1 174.00(9) . . ? 
N1 Ru Cl1 86.58(7) . . ? 
N2 Ru Cl1 86.39(7) . . ? 
O1 C1 Ru 178.2(3) . . ? 
O2 C2 Ru 179.0(3) . . ? 
C10 N1 C14 118.9(3) . . ? 
C10 N1 Ru 125.7(2) . . ? 
C14 N1 Ru 115.4(2) . . ? 
C19 N2 C15 119.8(3) . . ? 
C19 N2 Ru 125.6(3) . . ? 
C15 N2 Ru 114.6(3) . . ? 
N1 C10 C11 122.5(4) . . ? 
N1 C10 H10 118.8 . . ? 
C11 C10 H10 118.8 . . ? 
C12 C11 C10 118.3(4) . . ? 
C12 C11 H11 120.8 . . ? 
C10 C11 H11 120.8 . . ? 
C11 C12 C13 120.7(4) . . ? 
C11 C12 H12 119.7 . . ? 
C13 C12 H12 119.7 . . ? 
C12 C13 C14 118.8(4) . . ? 
C12 C13 H13 120.6 . . ? 
C14 C13 H13 120.6 . . ? 
N1 C14 C13 120.8(4) . . ? 
N1 C14 C15 115.8(3) . . ? 
C13 C14 C15 123.3(4) . . ? 
N2 C15 C16 120.0(4) . . ? 
N2 C15 C14 116.5(3) . . ? 
C16 C15 C14 123.5(4) . . ? 
C17 C16 C15 119.3(5) . . ? 
C17 C16 H16 120.4 . . ? 
C15 C16 H16 120.4 . . ? 
C18 C17 C16 120.0(5) . . ? 
C18 C17 H17 120.0 . . ? 
C16 C17 H17 120.0 . . ? 
C17 C18 C19 118.9(5) . . ? 
C17 C18 H18 120.5 . . ? 
C19 C18 H18 120.5 . . ? 
N2 C19 C18 121.9(4) . . ? 
N2 C19 H19 119.0 . . ? 
C18 C19 H19 119.0 . . ? 
O51 C5 O52 120.4(3) . . ? 
O51 C5 Ru 127.1(2) . . ? 
O52 C5 Ru 112.5(2) . . ? 
C5 O52 C51 117.6(2) . . ? 
O52 C51 C52 106.3(2) . . ? 
O52 C51 H51B 110.5 . . ? 
C52 C51 H51B 110.5 . . ? 
O52 C51 H51A 110.5 . . ? 
C52 C51 H51A 110.5 . . ? 
H51B C51 H51A 108.7 . . ? 
O53 C52 C51 110.4(3) . . ? 
O53 C52 H52A 109.6 . . ? 
C51 C52 H52A 109.6 . . ? 
O53 C52 H52B 109.6 . . ? 
C51 C52 H52B 109.6 . . ? 
H52A C52 H52B 108.1 . . ? 
C52 O53 H53 109.5 . . ? 
C2B RuB C1B 87.94(14) . . ? 
C2B RuB C5B 89.84(14) . . ? 
C1B RuB C5B 92.39(15) . . ? 
C2B RuB N1B 95.74(12) . . ? 
C1B RuB N1B 176.11(13) . . ? 
C5B RuB N1B 88.90(12) . . ? 
C2B RuB N2B 171.68(12) . . ? 
C1B RuB N2B 99.17(13) . . ? 
C5B RuB N2B 85.58(12) . . ? 
N1B RuB N2B 77.26(10) . . ? 
C2B RuB Cl1B 97.32(10) . . ? 
C1B RuB Cl1B 90.20(11) . . ? 
C5B RuB Cl1B 172.47(11) . . ? 
N1B RuB Cl1B 88.08(7) . . ? 
N2B RuB Cl1B 87.03(7) . . ? 
O1B C1B RuB 176.9(4) . . ? 
O2B C2B RuB 176.9(3) . . ? 
C14B N1B C10B 118.2(3) . . ? 
C14B N1B RuB 116.21(19) . . ? 
C10B N1B RuB 125.6(2) . . ? 
C15B N2B C19B 118.3(3) . . ? 
C15B N2B RuB 115.94(19) . . ? 
C19B N2B RuB 125.7(2) . . ? 
N1B C10B C11B 122.5(3) . . ? 
N1B C10B H10B 118.8 . . ? 
C11B C10B H10B 118.8 . . ? 
C12B C11B C10B 119.1(3) . . ? 
C12B C11B H11B 120.4 . . ? 
C10B C11B H11B 120.4 . . ? 
C11B C12B C13B 118.8(4) . . ? 
C11B C12B H12B 120.6 . . ? 
C13B C12B H12B 120.6 . . ? 
C14B C13B C12B 119.6(4) . . ? 
C14B C13B H13B 120.2 . . ? 
C12B C13B H13B 120.2 . . ? 
N1B C14B C13B 121.9(3) . . ? 
N1B C14B C15B 115.3(3) . . ? 
C13B C14B C15B 122.9(3) . . ? 
N2B C15B C16B 121.3(3) . . ? 
N2B C15B C14B 115.3(3) . . ? 
C16B C15B C14B 123.4(3) . . ? 
C17B C16B C15B 119.6(3) . . ? 
C17B C16B H16B 120.2 . . ? 
C15B C16B H16B 120.2 . . ? 
C18B C17B C16B 119.1(3) . . ? 
C18B C17B H17B 120.5 . . ? 
C16B C17B H17B 120.5 . . ? 
C17B C18B C19B 119.0(3) . . ? 
C17B C18B H18B 120.5 . . ? 
C19B C18B H18B 120.5 . . ? 
N2B C19B C18B 122.6(3) . . ? 
N2B C19B H19B 118.7 . . ? 
C18B C19B H19B 118.7 . . ? 
O51B C5B O52B 120.2(3) . . ? 
O51B C5B RuB 126.2(3) . . ? 
O52B C5B RuB 113.6(3) . . ? 
C5B O52B C51B 116.4(3) . . ? 
O52B C51B C52B 106.3(3) . . ? 
O52B C51B H51C 110.5 . . ? 
C52B C51B H51C 110.5 . . ? 
O52B C51B H51D 110.5 . . ? 
C52B C51B H51D 110.5 . . ? 
H51C C51B H51D 108.7 . . ? 
O53B C52B C51B 110.4(3) . . ? 
O53B C52B H52C 109.6 . . ? 
C51B C52B H52C 109.6 . . ? 
O53B C52B H52D 109.6 . . ? 
C51B C52B H52D 109.6 . . ? 
H52C C52B H52D 108.1 . . ? 
C52B O53B H53B 109.5 . . ? 
C9B C9A C9A 88.9(14) 2 2 ? 
C9B C9A O9B 128(2) 2 . ? 
C9A C9A O9B 94.5(11) 2 . ? 
C9B C9A C9B 61.8(16) 2 . ? 
C9A C9A C9B 40.1(7) 2 . ? 
O9B C9A C9B 134.2(11) . . ? 
C9B C9A O9C 72.8(16) 2 . ? 
C9A C9A O9C 86.4(16) 2 . ? 
O9B C9A O9C 55.9(10) . . ? 
C9B C9A O9C 104.5(13) . . ? 
C9B C9A O9C 112(2) 2 2 ? 
C9A C9A O9C 55.2(12) 2 2 ? 
O9B C9A O9C 112.3(14) . 2 ? 
C9B C9A O9C 53.7(7) . 2 ? 
O9C C9A O9C 140.3(10) . 2 ? 
C9B C9A O9A 34.4(13) 2 . ? 
C9A C9A O9A 91.5(14) 2 . ? 
O9B C9A O9A 93.8(11) . . ? 
C9B C9A O9A 84.2(11) . . ? 
O9C C9A O9A 38.9(7) . . ? 
O9C C9A O9A 137.7(11) 2 . ? 
C9B C9A O9B 136.3(15) 2 2 ? 
C9A C9A O9B 47.9(7) 2 2 ? 
O9B C9A O9B 70.7(11) . 2 ? 
C9B C9A O9B 77.4(7) . 2 ? 
O9C C9A O9B 105.1(13) . 2 ? 
O9C C9A O9B 43.2(5) 2 2 ? 
O9A C9A O9B 132.6(10) . 2 ? 
C9A C9B O9A 118.9(19) 2 2 ? 
C9A C9B C9B 79.0(15) 2 2 ? 
O9A C9B C9B 126(2) 2 2 ? 
C9A C9B C9A 51.1(13) 2 . ? 
O9A C9B C9A 110.8(13) 2 . ? 
C9B C9B C9A 39.2(6) 2 . ? 
C9A C9B O9C 70.9(14) 2 2 ? 
O9A C9B O9C 48.6(9) 2 2 ? 
C9B C9B O9C 111.4(14) 2 2 ? 
C9A C9B O9C 75.5(10) . 2 ? 
O9C O9A C9B 81.1(12) . 2 ? 
O9C O9A C9A 54.8(9) . . ? 
C9B O9A C9A 26.7(8) 2 . ? 
O9C O9B C9A 66.6(10) . . ? 
O9C O9B C9A 67.2(9) . 2 ? 
C9A O9B C9A 37.6(8) . 2 ? 
O9A O9C O9B 141.2(17) . . ? 
O9A O9C C9A 86.3(12) . . ? 
O9B O9C C9A 57.6(10) . . ? 
O9A O9C C9B 50.3(10) . 2 ? 
O9B O9C C9B 93.6(14) . 2 ? 
C9A O9C C9B 36.3(8) . 2 ? 
O9A O9C C9A 91.4(11) . 2 ? 
O9B O9C C9A 69.6(10) . 2 ? 
C9A O9C C9A 38.4(9) . 2 ? 
C9B O9C C9A 50.8(7) 2 2 ? 
 
loop_ 
 _geom_torsion_atom_site_label_1 
 _geom_torsion_atom_site_label_2 
 _geom_torsion_atom_site_label_3 
 _geom_torsion_atom_site_label_4 
 _geom_torsion 
 _geom_torsion_site_symmetry_1 
 _geom_torsion_site_symmetry_2 
 _geom_torsion_site_symmetry_3 
 _geom_torsion_site_symmetry_4 
 _geom_torsion_publ_flag 
C2 Ru C1 O1 -57(12) . . . . ? 
C5 Ru C1 O1 32(12) . . . . ? 
N1 Ru C1 O1 92(13) . . . . ? 
N2 Ru C1 O1 121(12) . . . . ? 
Cl1 Ru C1 O1 -152(12) . . . . ? 
C1 Ru C2 O2 140(23) . . . . ? 
C5 Ru C2 O2 51(23) . . . . ? 
N1 Ru C2 O2 -38(23) . . . . ? 
N2 Ru C2 O2 -23(24) . . . . ? 
Cl1 Ru C2 O2 -125(23) . . . . ? 
C2 Ru N1 C10 -4.2(3) . . . . ? 
C1 Ru N1 C10 -153.2(18) . . . . ? 
C5 Ru N1 C10 -93.8(3) . . . . ? 
N2 Ru N1 C10 177.7(3) . . . . ? 
Cl1 Ru N1 C10 90.7(3) . . . . ? 
C2 Ru N1 C14 175.8(2) . . . . ? 
C1 Ru N1 C14 26.8(19) . . . . ? 
C5 Ru N1 C14 86.2(2) . . . . ? 
N2 Ru N1 C14 -2.3(2) . . . . ? 
Cl1 Ru N1 C14 -89.3(2) . . . . ? 
C2 Ru N2 C19 165.7(9) . . . . ? 
C1 Ru N2 C19 3.2(3) . . . . ? 
C5 Ru N2 C19 91.5(3) . . . . ? 
N1 Ru N2 C19 -178.8(3) . . . . ? 
Cl1 Ru N2 C19 -91.5(3) . . . . ? 
C2 Ru N2 C15 -14.1(11) . . . . ? 
C1 Ru N2 C15 -176.6(2) . . . . ? 
C5 Ru N2 C15 -88.3(2) . . . . ? 
N1 Ru N2 C15 1.4(2) . . . . ? 
Cl1 Ru N2 C15 88.7(2) . . . . ? 
C14 N1 C10 C11 -0.7(5) . . . . ? 
Ru N1 C10 C11 179.3(2) . . . . ? 
N1 C10 C11 C12 -0.4(6) . . . . ? 
C10 C11 C12 C13 0.7(6) . . . . ? 
C11 C12 C13 C14 0.1(6) . . . . ? 
C10 N1 C14 C13 1.5(5) . . . . ? 
Ru N1 C14 C13 -178.5(2) . . . . ? 
C10 N1 C14 C15 -177.2(3) . . . . ? 
Ru N1 C14 C15 2.8(3) . . . . ? 
C12 C13 C14 N1 -1.2(5) . . . . ? 
C12 C13 C14 C15 177.4(3) . . . . ? 
C19 N2 C15 C16 2.1(5) . . . . ? 
Ru N2 C15 C16 -178.0(2) . . . . ? 
C19 N2 C15 C14 179.7(3) . . . . ? 
Ru N2 C15 C14 -0.4(3) . . . . ? 
N1 C14 C15 N2 -1.6(4) . . . . ? 
C13 C14 C15 N2 179.7(3) . . . . ? 
N1 C14 C15 C16 175.9(3) . . . . ? 
C13 C14 C15 C16 -2.8(5) . . . . ? 
N2 C15 C16 C17 -3.0(5) . . . . ? 
C14 C15 C16 C17 179.6(3) . . . . ? 
C15 C16 C17 C18 2.4(6) . . . . ? 
C16 C17 C18 C19 -1.1(7) . . . . ? 
C15 N2 C19 C18 -0.8(5) . . . . ? 
Ru N2 C19 C18 179.4(3) . . . . ? 
C17 C18 C19 N2 0.2(6) . . . . ? 
C2 Ru C5 O51 -133.6(3) . . . . ? 
C1 Ru C5 O51 138.4(3) . . . . ? 
N1 Ru C5 O51 -38.1(3) . . . . ? 
N2 Ru C5 O51 39.4(3) . . . . ? 
Cl1 Ru C5 O51 9.8(12) . . . . ? 
C2 Ru C5 O52 47.2(2) . . . . ? 
C1 Ru C5 O52 -40.7(2) . . . . ? 
N1 Ru C5 O52 142.8(2) . . . . ? 
N2 Ru C5 O52 -139.7(2) . . . . ? 
Cl1 Ru C5 O52 -169.3(7) . . . . ? 
O51 C5 O52 C51 -3.1(5) . . . . ? 
Ru C5 O52 C51 176.1(2) . . . . ? 
C5 O52 C51 C52 170.9(3) . . . . ? 
O52 C51 C52 O53 -68.4(4) . . . . ? 
C2B RuB C1B O1B 75(7) . . . . ? 
C5B RuB C1B O1B 165(7) . . . . ? 
N1B RuB C1B O1B -86(7) . . . . ? 
N2B RuB C1B O1B -110(7) . . . . ? 
Cl1B RuB C1B O1B -23(7) . . . . ? 
C1B RuB C2B O2B 114(6) . . . . ? 
C5B RuB C2B O2B 21(6) . . . . ? 
N1B RuB C2B O2B -67(6) . . . . ? 
N2B RuB C2B O2B -35(6) . . . . ? 
Cl1B RuB C2B O2B -156(6) . . . . ? 
C2B RuB N1B C14B 173.6(2) . . . . ? 
C1B RuB N1B C14B -26(2) . . . . ? 
C5B RuB N1B C14B 83.9(2) . . . . ? 
N2B RuB N1B C14B -1.8(2) . . . . ? 
Cl1B RuB N1B C14B -89.2(2) . . . . ? 
C2B RuB N1B C10B -6.5(3) . . . . ? 
C1B RuB N1B C10B 154.4(19) . . . . ? 
C5B RuB N1B C10B -96.2(3) . . . . ? 
N2B RuB N1B C10B 178.1(3) . . . . ? 
Cl1B RuB N1B C10B 90.7(2) . . . . ? 
C2B RuB N2B C15B -31.0(9) . . . . ? 
C1B RuB N2B C15B -179.5(2) . . . . ? 
C5B RuB N2B C15B -87.8(2) . . . . ? 
N1B RuB N2B C15B 2.1(2) . . . . ? 
Cl1B RuB N2B C15B 90.8(2) . . . . ? 
C2B RuB N2B C19B 145.5(8) . . . . ? 
C1B RuB N2B C19B -3.0(3) . . . . ? 
C5B RuB N2B C19B 88.7(3) . . . . ? 
N1B RuB N2B C19B 178.6(3) . . . . ? 
Cl1B RuB N2B C19B -92.7(2) . . . . ? 
C14B N1B C10B C11B -1.7(5) . . . . ? 
RuB N1B C10B C11B 178.4(2) . . . . ? 
N1B C10B C11B C12B 1.5(6) . . . . ? 
C10B C11B C12B C13B -0.4(6) . . . . ? 
C11B C12B C13B C14B -0.4(6) . . . . ? 
C10B N1B C14B C13B 0.9(5) . . . . ? 
RuB N1B C14B C13B -179.3(3) . . . . ? 
C10B N1B C14B C15B -178.6(3) . . . . ? 
RuB N1B C14B C15B 1.3(3) . . . . ? 
C12B C13B C14B N1B 0.2(5) . . . . ? 
C12B C13B C14B C15B 179.6(3) . . . . ? 
C19B N2B C15B C16B 0.8(5) . . . . ? 
RuB N2B C15B C16B 177.5(2) . . . . ? 
C19B N2B C15B C14B -178.8(3) . . . . ? 
RuB N2B C15B C14B -2.1(3) . . . . ? 
N1B C14B C15B N2B 0.5(4) . . . . ? 
C13B C14B C15B N2B -178.9(3) . . . . ? 
N1B C14B C15B C16B -179.1(3) . . . . ? 
C13B C14B C15B C16B 1.5(5) . . . . ? 
N2B C15B C16B C17B -1.0(5) . . . . ? 
C14B C15B C16B C17B 178.6(3) . . . . ? 
C15B C16B C17B C18B 0.0(5) . . . . ? 
C16B C17B C18B C19B 1.2(5) . . . . ? 
C15B N2B C19B C18B 0.5(5) . . . . ? 
RuB N2B C19B C18B -175.9(2) . . . . ? 
C17B C18B C19B N2B -1.5(5) . . . . ? 
C2B RuB C5B O51B -143.9(3) . . . . ? 
C1B RuB C5B O51B 128.2(3) . . . . ? 
N1B RuB C5B O51B -48.1(3) . . . . ? 
N2B RuB C5B O51B 29.2(3) . . . . ? 
Cl1B RuB C5B O51B 18.2(10) . . . . ? 
C2B RuB C5B O52B 35.8(2) . . . . ? 
C1B RuB C5B O52B -52.1(2) . . . . ? 
N1B RuB C5B O52B 131.6(2) . . . . ? 
N2B RuB C5B O52B -151.1(2) . . . . ? 
Cl1B RuB C5B O52B -162.1(5) . . . . ? 
O51B C5B O52B C51B 0.6(5) . . . . ? 
RuB C5B O52B C51B -179.1(2) . . . . ? 
C5B O52B C51B C52B -176.2(3) . . . . ? 
O52B C51B C52B O53B 68.6(4) . . . . ? 
C9B C9A C9B C9A -127(4) 2 . . 2 ? 
O9B C9A C9B C9A -10(2) . . . 2 ? 
O9C C9A C9B C9A -66(3) . . . 2 ? 
O9C C9A C9B C9A 76.9(18) 2 . . 2 ? 
O9A C9A C9B C9A -99(3) . . . 2 ? 
O9B C9A C9B C9A 36.7(17) 2 . . 2 ? 
C9B C9A C9B O9A 122(3) 2 . . 2 ? 
C9A C9A C9B O9A -111(2) 2 . . 2 ? 
O9B C9A C9B O9A -121(2) . . . 2 ? 
O9C C9A C9B O9A -176.8(17) . . . 2 ? 
O9C C9A C9B O9A -34.0(10) 2 . . 2 ? 
O9A C9A C9B O9A 149.7(15) . . . 2 ? 
O9B C9A C9B O9A -74.2(12) 2 . . 2 ? 
C9A C9A C9B C9B 127(4) 2 . . 2 ? 
O9B C9A C9B C9B 117(3) . . . 2 ? 
O9C C9A C9B C9B 61.1(18) . . . 2 ? 
O9C C9A C9B C9B -156(3) 2 . . 2 ? 
O9A C9A C9B C9B 27.6(17) . . . 2 ? 
O9B C9A C9B C9B 164(2) 2 . . 2 ? 
C9B C9A C9B O9C 156(3) 2 . . 2 ? 
C9A C9A C9B O9C -76.9(18) 2 . . 2 ? 
O9B C9A C9B O9C -87(2) . . . 2 ? 
O9C C9A C9B O9C -142.8(18) . . . 2 ? 
O9A C9A C9B O9C -176.3(15) . . . 2 ? 
O9B C9A C9B O9C -40.2(8) 2 . . 2 ? 
C9B C9A O9A O9C 168(3) 2 . . . ? 
C9A C9A O9A O9C 82.3(12) 2 . . . ? 
O9B C9A O9A O9C -12.3(12) . . . . ? 
C9B C9A O9A O9C 121.8(12) . . . . ? 
O9C C9A O9A O9C 117.3(18) 2 . . . ? 
O9B C9A O9A O9C 54.8(15) 2 . . . ? 
C9A C9A O9A C9B -86(2) 2 . . 2 ? 
O9B C9A O9A C9B 180(3) . . . 2 ? 
C9B C9A O9A C9B -46(2) . . . 2 ? 
O9C C9A O9A C9B -168(3) . . . 2 ? 
O9C C9A O9A C9B -51(3) 2 . . 2 ? 
O9B C9A O9A C9B -113(3) 2 . . 2 ? 
C9B C9A O9B O9C 10(2) 2 . . . ? 
C9A C9A O9B O9C -82.5(15) 2 . . . ? 
C9B C9A O9B O9C -76.2(18) . . . . ? 
O9C C9A O9B O9C -136.6(9) 2 . . . ? 
O9A C9A O9B O9C 9.3(9) . . . . ? 
O9B C9A O9B O9C -124.8(12) 2 . . . ? 
C9B C9A O9B C9A 92(3) 2 . . 2 ? 
C9B C9A O9B C9A 6.3(15) . . . 2 ? 
O9C C9A O9B C9A 82.5(15) . . . 2 ? 
O9C C9A O9B C9A -54.1(11) 2 . . 2 ? 
O9A C9A O9B C9A 91.8(16) . . . 2 ? 
O9B C9A O9B C9A -42.3(14) 2 . . 2 ? 
C9B O9A O9C O9B 26(2) 2 . . . ? 
C9A O9A O9C O9B 20.2(19) . . . . ? 
C9B O9A O9C C9A 5.4(11) 2 . . . ? 
C9A O9A O9C C9B -5.4(11) . . . 2 ? 
C9B O9A O9C C9A -32.7(10) 2 . . 2 ? 
C9A O9A O9C C9A -38.1(8) . . . 2 ? 
C9A O9B O9C O9A -24(2) . . . . ? 
C9A O9B O9C O9A -65(2) 2 . . . ? 
C9A O9B O9C C9A -41.1(9) 2 . . . ? 
C9A O9B O9C C9B -4.6(10) . . . 2 ? 
C9A O9B O9C C9B -45.7(7) 2 . . 2 ? 
C9A O9B O9C C9A 41.1(9) . . . 2 ? 
C9B C9A O9C O9A -7.0(15) 2 . . . ? 
C9A C9A O9C O9A -97.0(9) 2 . . . ? 
O9B C9A O9C O9A 165.1(14) . . . . ? 
C9B C9A O9C O9A -60.9(11) . . . . ? 
O9C C9A O9C O9A -111(3) 2 . . . ? 
O9B C9A O9C O9A -141.5(9) 2 . . . ? 
C9B C9A O9C O9B -172.2(18) 2 . . . ? 
C9A C9A O9C O9B 97.9(8) 2 . . . ? 
C9B C9A O9C O9B 134.0(11) . . . . ? 
O9C C9A O9C O9B 84(3) 2 . . . ? 
O9A C9A O9C O9B -165.1(14) . . . . ? 
O9B C9A O9C O9B 53.4(11) 2 . . . ? 
C9A C9A O9C C9B -89.9(12) 2 . . 2 ? 
O9B C9A O9C C9B 172.2(18) . . . 2 ? 
C9B C9A O9C C9B -53.8(15) . . . 2 ? 
O9C C9A O9C C9B -104(3) 2 . . 2 ? 
O9A C9A O9C C9B 7.0(15) . . . 2 ? 
O9B C9A O9C C9B -134.4(16) 2 . . 2 ? 
C9B C9A O9C C9A 89.9(12) 2 . . 2 ? 
O9B C9A O9C C9A -97.9(8) . . . 2 ? 
C9B C9A O9C C9A 36.1(8) . . . 2 ? 
O9C C9A O9C C9A -14(3) 2 . . 2 ? 
O9A C9A O9C C9A 97.0(9) . . . 2 ? 
O9B C9A O9C C9A -44.5(7) 2 . . 2 ? 
 
_diffrn_measured_fraction_theta_max    0.997 
_diffrn_reflns_theta_full              25.00 
_diffrn_measured_fraction_theta_full   0.997 
_refine_diff_density_max    0.481 
_refine_diff_density_min   -0.291 
_refine_diff_density_rms    0.056 


data_Ru(bpy)(CO)2ClH

_audit_creation_method            SHELXL-97
_chemical_name_systematic 
; 
 ? 
; 
_chemical_name_common             'Ru(bpy)(CO)2ClH'
_chemical_formula_moiety          ? 
_chemical_formula_sum 
 'C12 H9 Cl N2 O2 Ru' 
_chemical_formula_weight          349.73 
 
loop_ 
 _atom_type_symbol 
 _atom_type_description 
 _atom_type_scat_dispersion_real 
 _atom_type_scat_dispersion_imag 
 _atom_type_scat_source 
 'C'  'C'   0.0033   0.0016 
 'International Tables Vol C Tables 4.2.6.8 and 6.1.1.4' 
 'H'  'H'   0.0000   0.0000 
 'International Tables Vol C Tables 4.2.6.8 and 6.1.1.4' 
 'Ru'  'Ru'  -1.2594   0.8363 
 'International Tables Vol C Tables 4.2.6.8 and 6.1.1.4' 
 'Cl'  'Cl'   0.1484   0.1585 
 'International Tables Vol C Tables 4.2.6.8 and 6.1.1.4' 
 'O'  'O'   0.0106   0.0060 
 'International Tables Vol C Tables 4.2.6.8 and 6.1.1.4' 
 'N'  'N'   0.0061   0.0033 
 'International Tables Vol C Tables 4.2.6.8 and 6.1.1.4' 
 
_symmetry_cell_setting            Triclinic 
_symmetry_space_group_name_H-M    P-1 
 
loop_ 
 _symmetry_equiv_pos_as_xyz 
 'x, y, z' 
 '-x, -y, -z' 
 
_cell_length_a                    6.3871(10) 
_cell_length_b                    8.132(2) 
_cell_length_c                    12.693(3) 
_cell_angle_alpha                 89.20(3) 
_cell_angle_beta                  81.37(3) 
_cell_angle_gamma                 81.20(3) 
_cell_volume                      644.2(2) 
_cell_formula_units_Z             2 
_cell_measurement_temperature     293(2) 
_cell_measurement_reflns_used     ? 
_cell_measurement_theta_min       ? 
_cell_measurement_theta_max       ? 
 
_exptl_crystal_description        'Block' 
_exptl_crystal_colour             'Brownish yellow'
_exptl_crystal_size_max           0.4 
_exptl_crystal_size_mid           0.2 
_exptl_crystal_size_min           0.2 
_exptl_crystal_density_meas       ? 
_exptl_crystal_density_diffrn     1.803 
_exptl_crystal_density_method     'not measured' 
_exptl_crystal_F_000              344 
_exptl_absorpt_coefficient_mu     1.418 
_exptl_absorpt_correction_type    ? 
_exptl_absorpt_correction_T_min   ? 
_exptl_absorpt_correction_T_max   ? 
 
_exptl_special_details 
; 
 ? 
; 
 
_diffrn_ambient_temperature       293(2) 
_diffrn_radiation_wavelength      0.71073 
_diffrn_radiation_type            MoK\a 
_diffrn_radiation_source          'fine-focus sealed tube' 
_diffrn_radiation_monochromator   graphite 
_diffrn_measurement_device_type   'Nonius Kappa CCD' 
_diffrn_measurement_method        'phi-scan' 
_diffrn_detector_area_resol_mean  ? 
_diffrn_standards_number          ? 
_diffrn_standards_interval_count  ? 
_diffrn_standards_interval_time   ? 
_diffrn_standards_decay_%         ? 
_diffrn_reflns_number             2126 
_diffrn_reflns_av_R_equivalents   0.0000 
_diffrn_reflns_av_sigmaI/netI     0.0374 
_diffrn_reflns_limit_h_min        0 
_diffrn_reflns_limit_h_max        7 
_diffrn_reflns_limit_k_min        -9 
_diffrn_reflns_limit_k_max        9 
_diffrn_reflns_limit_l_min        -14 
_diffrn_reflns_limit_l_max        15 
_diffrn_reflns_theta_min          2.53 
_diffrn_reflns_theta_max          25.00 
_reflns_number_total              2126 
_reflns_number_gt                 1853 
_reflns_threshold_expression      >2sigma(I) 
 
_computing_data_collection        'kcd (Nonius B.V., 1997)'  
_computing_cell_refinement        'Denzo/Scalepack (Otwinowski, Minor, 1997)' 
_computing_data_reduction         'Denzo/Scalepack (Otwinowski, Minor, 1997)' 
_computing_structure_solution     'SHELXS-97 (Sheldrick, 1990)' 
_computing_structure_refinement   'SHELXL-97 (Sheldrick, 1997)' 
_computing_molecular_graphics     ? 
_computing_publication_material   SHELXL-97 
 
_refine_special_details 
; 
 Refinement of F^2^ against ALL reflections.  The weighted R-factor wR and 
 goodness of fit S are based on F^2^, conventional R-factors R are based 
 on F, with F set to zero for negative F^2^. The threshold expression of 
 F^2^ > 2sigma(F^2^) is used only for calculating R-factors(gt) etc. and is 
 not relevant to the choice of reflections for refinement.  R-factors based 
 on F^2^ are statistically about twice as large as those based on F, and R- 
 factors based on ALL data will be even larger. 
; 
 
_refine_ls_structure_factor_coef  Fsqd  
_refine_ls_matrix_type            full 
_refine_ls_weighting_scheme 
 'calc w=1/[\s^2^(Fo^2^)+(0.0222P)^2^+0.2687P] where P=(Fo^2^+2Fc^2^)/3' 
_atom_sites_solution_primary      direct 
_atom_sites_solution_secondary    difmap 
_atom_sites_solution_hydrogens    geom 
_refine_ls_hydrogen_treatment     mixed 
_refine_ls_extinction_method      SHELXL 
_refine_ls_extinction_coef        0.0055(14) 
_refine_ls_extinction_expression 
 'Fc^*^=kFc[1+0.001xFc^2^\l^3^/sin(2\q)]^-1/4^' 
_refine_ls_number_reflns          2126 
_refine_ls_number_parameters      200 
_refine_ls_number_restraints      0 
_refine_ls_R_factor_all           0.0355 
_refine_ls_R_factor_gt            0.0257 
_refine_ls_wR_factor_ref          0.0598 
_refine_ls_wR_factor_gt           0.0556 
_refine_ls_goodness_of_fit_ref    1.074 
_refine_ls_restrained_S_all       1.074 
_refine_ls_shift/su_max           0.001 
_refine_ls_shift/su_mean          0.000 
 
loop_ 
 _atom_site_label 
 _atom_site_type_symbol 
 _atom_site_fract_x 
 _atom_site_fract_y 
 _atom_site_fract_z 
 _atom_site_U_iso_or_equiv 
 _atom_site_adp_type 
 _atom_site_occupancy 
 _atom_site_calc_flag 
 _atom_site_refinement_flags 
 _atom_site_disorder_assembly 
 _atom_site_disorder_group 
Ru Ru 0.63170(4) 0.63350(3) 0.81238(2) 0.04116(13) Uani 1 d . . . 
Cl1 Cl 0.45557(13) 0.74429(10) 0.65540(6) 0.0483(2) Uani 1 d . . . 
C1 C 0.4374(6) 0.7495(4) 0.9197(3) 0.0539(9) Uani 1 d . . . 
O1 O 0.3213(5) 0.8170(4) 0.9890(2) 0.0779(8) Uani 1 d . . . 
C2 C 0.8037(6) 0.7959(5) 0.8198(3) 0.0571(9) Uani 1 d . . . 
O2 O 0.9118(5) 0.8928(4) 0.8282(3) 0.0941(11) Uani 1 d . . . 
N1 N 0.8470(4) 0.4729(3) 0.7021(2) 0.0401(6) Uani 1 d . . . 
N2 N 0.4726(4) 0.4240(3) 0.8063(2) 0.0419(6) Uani 1 d . . . 
C10 C 1.0385(5) 0.5039(5) 0.6513(3) 0.0459(8) Uani 1 d . . . 
C11 C 1.1686(6) 0.3968(5) 0.5797(3) 0.0547(9) Uani 1 d . . . 
C12 C 1.1049(6) 0.2507(5) 0.5571(3) 0.0646(10) Uani 1 d . . . 
C13 C 0.9114(6) 0.2157(5) 0.6077(3) 0.0618(10) Uani 1 d . . . 
C14 C 0.7846(5) 0.3269(4) 0.6807(3) 0.0436(7) Uani 1 d . . . 
C15 C 0.5782(5) 0.2981(4) 0.7411(3) 0.0432(7) Uani 1 d . . . 
C16 C 0.4935(6) 0.1517(4) 0.7330(3) 0.0551(9) Uani 1 d . . . 
C17 C 0.3006(6) 0.1352(5) 0.7937(4) 0.0616(10) Uani 1 d . . . 
C18 C 0.1941(6) 0.2614(5) 0.8586(3) 0.0579(10) Uani 1 d . . . 
C19 C 0.2839(6) 0.4043(5) 0.8629(3) 0.0491(8) Uani 1 d . . . 
H10 H 1.065(5) 0.597(4) 0.667(3) 0.047(10) Uiso 1 d . . . 
H11 H 1.295(5) 0.430(4) 0.546(2) 0.043(9) Uiso 1 d . . . 
H12 H 1.192(7) 0.173(6) 0.507(4) 0.093(14) Uiso 1 d . . . 
H13 H 0.864(7) 0.123(6) 0.598(4) 0.091(15) Uiso 1 d . . . 
H16 H 0.572(6) 0.072(5) 0.681(3) 0.077(13) Uiso 1 d . . . 
H17 H 0.244(6) 0.050(5) 0.787(3) 0.068(12) Uiso 1 d . . . 
H18 H 0.065(5) 0.254(4) 0.900(3) 0.047(9) Uiso 1 d . . . 
H19 H 0.223(6) 0.483(5) 0.905(3) 0.052(11) Uiso 1 d . . . 
H5 H 0.754(5) 0.541(4) 0.910(2) 0.052(9) Uiso 1 d . . . 
 
loop_ 
 _atom_site_aniso_label 
 _atom_site_aniso_U_11 
 _atom_site_aniso_U_22 
 _atom_site_aniso_U_33 
 _atom_site_aniso_U_23 
 _atom_site_aniso_U_13 
 _atom_site_aniso_U_12 
Ru 0.04028(18) 0.03973(18) 0.04475(19) -0.00411(11) -0.00262(10) -0.01340(10) 
Cl1 0.0475(5) 0.0459(5) 0.0524(5) 0.0013(4) -0.0054(3) -0.0119(3) 
C1 0.056(2) 0.049(2) 0.058(2) -0.0005(17) -0.0045(17) -0.0163(16) 
O1 0.0786(19) 0.075(2) 0.0694(18) -0.0169(15) 0.0156(15) -0.0026(15) 
C2 0.050(2) 0.054(2) 0.067(2) -0.0127(18) -0.0017(17) -0.0109(17) 
O2 0.072(2) 0.078(2) 0.139(3) -0.035(2) 0.0010(18) -0.0433(17) 
N1 0.0346(14) 0.0438(15) 0.0435(15) 0.0019(12) -0.0053(11) -0.0120(11) 
N2 0.0387(15) 0.0418(15) 0.0465(15) 0.0036(12) -0.0046(11) -0.0115(11) 
C10 0.0422(19) 0.047(2) 0.050(2) 0.0019(16) -0.0070(14) -0.0130(15) 
C11 0.042(2) 0.068(3) 0.053(2) 0.0005(18) 0.0008(16) -0.0118(17) 
C12 0.054(2) 0.069(3) 0.064(3) -0.017(2) 0.0069(18) -0.0057(19) 
C13 0.060(2) 0.052(2) 0.072(3) -0.015(2) -0.0003(19) -0.0129(18) 
C14 0.0406(18) 0.0423(18) 0.0493(19) -0.0049(15) -0.0061(14) -0.0113(14) 
C15 0.0402(18) 0.0371(18) 0.055(2) 0.0039(15) -0.0096(14) -0.0108(13) 
C16 0.048(2) 0.040(2) 0.080(3) -0.0023(19) -0.0115(18) -0.0139(15) 
C17 0.056(2) 0.044(2) 0.091(3) 0.013(2) -0.017(2) -0.0242(19) 
C18 0.043(2) 0.065(3) 0.069(2) 0.020(2) -0.0055(17) -0.0227(17) 
C19 0.046(2) 0.052(2) 0.050(2) 0.0047(18) -0.0006(15) -0.0150(16) 
 
_geom_special_details 
; 
 All esds (except the esd in the dihedral angle between two l.s. planes) 
 are estimated using the full covariance matrix.  The cell esds are taken 
 into account individually in the estimation of esds in distances, angles 
 and torsion angles; correlations between esds in cell parameters are only 
 used when they are defined by crystal symmetry.  An approximate (isotropic) 
 treatment of cell esds is used for estimating esds involving l.s. planes. 
; 
 
loop_ 
 _geom_bond_atom_site_label_1 
 _geom_bond_atom_site_label_2 
 _geom_bond_distance 
 _geom_bond_site_symmetry_2 
 _geom_bond_publ_flag 
Ru C2 1.854(4) . ? 
Ru C1 1.859(4) . ? 
Ru N1 2.117(3) . ? 
Ru N2 2.121(3) . ? 
Ru Cl1 2.5219(11) . ? 
Ru H5 1.67(3) . ? 
C1 O1 1.148(4) . ? 
C2 O2 1.140(4) . ? 
N1 C14 1.353(4) . ? 
N1 C10 1.353(4) . ? 
N2 C19 1.338(4) . ? 
N2 C15 1.354(4) . ? 
C10 C11 1.360(5) . ? 
C10 H10 0.83(3) . ? 
C11 C12 1.361(5) . ? 
C11 H11 0.93(3) . ? 
C12 C13 1.373(5) . ? 
C12 H12 0.95(5) . ? 
C13 C14 1.381(5) . ? 
C13 H13 0.87(5) . ? 
C14 C15 1.471(4) . ? 
C15 C16 1.392(5) . ? 
C16 C17 1.376(5) . ? 
C16 H16 0.96(4) . ? 
C17 C18 1.355(6) . ? 
C17 H17 0.84(4) . ? 
C18 C19 1.378(5) . ? 
C18 H18 0.92(3) . ? 
C19 H19 0.84(4) . ? 
 
loop_ 
 _geom_angle_atom_site_label_1 
 _geom_angle_atom_site_label_2 
 _geom_angle_atom_site_label_3 
 _geom_angle 
 _geom_angle_site_symmetry_1 
 _geom_angle_site_symmetry_3 
 _geom_angle_publ_flag 
C2 Ru C1 87.46(15) . . ? 
C2 Ru N1 97.72(13) . . ? 
C1 Ru N1 172.44(13) . . ? 
C2 Ru N2 172.17(13) . . ? 
C1 Ru N2 97.31(12) . . ? 
N1 Ru N2 76.96(10) . . ? 
C2 Ru Cl1 98.49(13) . . ? 
C1 Ru Cl1 98.21(12) . . ? 
N1 Ru Cl1 86.52(7) . . ? 
N2 Ru Cl1 87.01(8) . . ? 
C2 Ru H5 85.4(11) . . ? 
C1 Ru H5 86.4(11) . . ? 
N1 Ru H5 88.5(11) . . ? 
N2 Ru H5 88.7(11) . . ? 
Cl1 Ru H5 174.0(11) . . ? 
O1 C1 Ru 177.2(3) . . ? 
O2 C2 Ru 177.2(4) . . ? 
C14 N1 C10 117.7(3) . . ? 
C14 N1 Ru 116.3(2) . . ? 
C10 N1 Ru 125.9(2) . . ? 
C19 N2 C15 118.3(3) . . ? 
C19 N2 Ru 126.0(2) . . ? 
C15 N2 Ru 115.67(19) . . ? 
N1 C10 C11 123.3(3) . . ? 
N1 C10 H10 112(2) . . ? 
C11 C10 H10 124(2) . . ? 
C10 C11 C12 119.1(3) . . ? 
C10 C11 H11 118(2) . . ? 
C12 C11 H11 123(2) . . ? 
C11 C12 C13 118.9(4) . . ? 
C11 C12 H12 121(3) . . ? 
C13 C12 H12 120(3) . . ? 
C12 C13 C14 120.3(4) . . ? 
C12 C13 H13 123(3) . . ? 
C14 C13 H13 116(3) . . ? 
N1 C14 C13 120.7(3) . . ? 
N1 C14 C15 115.1(3) . . ? 
C13 C14 C15 124.2(3) . . ? 
N2 C15 C16 121.0(3) . . ? 
N2 C15 C14 115.9(3) . . ? 
C16 C15 C14 123.1(3) . . ? 
C17 C16 C15 119.0(4) . . ? 
C17 C16 H16 125(3) . . ? 
C15 C16 H16 116(3) . . ? 
C18 C17 C16 120.1(4) . . ? 
C18 C17 H17 120(3) . . ? 
C16 C17 H17 120(3) . . ? 
C17 C18 C19 118.6(4) . . ? 
C17 C18 H18 122(2) . . ? 
C19 C18 H18 119(2) . . ? 
N2 C19 C18 123.0(4) . . ? 
N2 C19 H19 117(2) . . ? 
C18 C19 H19 120(2) . . ? 
 
loop_ 
 _geom_torsion_atom_site_label_1 
 _geom_torsion_atom_site_label_2 
 _geom_torsion_atom_site_label_3 
 _geom_torsion_atom_site_label_4 
 _geom_torsion 
 _geom_torsion_site_symmetry_1 
 _geom_torsion_site_symmetry_2 
 _geom_torsion_site_symmetry_3 
 _geom_torsion_site_symmetry_4 
 _geom_torsion_publ_flag 
C2 Ru C1 O1 -94(6) . . . . ? 
N1 Ru C1 O1 39(7) . . . . ? 
N2 Ru C1 O1 80(6) . . . . ? 
Cl1 Ru C1 O1 168(6) . . . . ? 
C1 Ru C2 O2 76(7) . . . . ? 
N1 Ru C2 O2 -99(7) . . . . ? 
N2 Ru C2 O2 -52(7) . . . . ? 
Cl1 Ru C2 O2 174(7) . . . . ? 
C2 Ru N1 C14 175.1(2) . . . . ? 
C1 Ru N1 C14 42.2(10) . . . . ? 
N2 Ru N1 C14 1.0(2) . . . . ? 
Cl1 Ru N1 C14 -86.8(2) . . . . ? 
C2 Ru N1 C10 -5.4(3) . . . . ? 
C1 Ru N1 C10 -138.3(9) . . . . ? 
N2 Ru N1 C10 -179.5(3) . . . . ? 
Cl1 Ru N1 C10 92.8(3) . . . . ? 
C2 Ru N2 C19 130.7(9) . . . . ? 
C1 Ru N2 C19 3.5(3) . . . . ? 
N1 Ru N2 C19 178.5(3) . . . . ? 
Cl1 Ru N2 C19 -94.4(3) . . . . ? 
C2 Ru N2 C15 -47.1(10) . . . . ? 
C1 Ru N2 C15 -174.3(2) . . . . ? 
N1 Ru N2 C15 0.7(2) . . . . ? 
Cl1 Ru N2 C15 87.8(2) . . . . ? 
C14 N1 C10 C11 0.7(5) . . . . ? 
Ru N1 C10 C11 -178.8(3) . . . . ? 
N1 C10 C11 C12 0.1(6) . . . . ? 
C10 C11 C12 C13 -0.3(6) . . . . ? 
C11 C12 C13 C14 -0.3(6) . . . . ? 
C10 N1 C14 C13 -1.3(5) . . . . ? 
Ru N1 C14 C13 178.3(3) . . . . ? 
C10 N1 C14 C15 178.1(3) . . . . ? 
Ru N1 C14 C15 -2.4(4) . . . . ? 
C12 C13 C14 N1 1.2(6) . . . . ? 
C12 C13 C14 C15 -178.1(4) . . . . ? 
C19 N2 C15 C16 -0.1(5) . . . . ? 
Ru N2 C15 C16 177.9(3) . . . . ? 
C19 N2 C15 C14 179.9(3) . . . . ? 
Ru N2 C15 C14 -2.2(4) . . . . ? 
N1 C14 C15 N2 3.0(4) . . . . ? 
C13 C14 C15 N2 -177.7(3) . . . . ? 
N1 C14 C15 C16 -177.0(3) . . . . ? 
C13 C14 C15 C16 2.3(6) . . . . ? 
N2 C15 C16 C17 -0.9(5) . . . . ? 
C14 C15 C16 C17 179.1(3) . . . . ? 
C15 C16 C17 C18 1.2(6) . . . . ? 
C16 C17 C18 C19 -0.6(6) . . . . ? 
C15 N2 C19 C18 0.8(5) . . . . ? 
Ru N2 C19 C18 -176.9(3) . . . . ? 
C17 C18 C19 N2 -0.4(6) . . . . ? 
 
_diffrn_measured_fraction_theta_max    0.937 
_diffrn_reflns_theta_full              25.00 
_diffrn_measured_fraction_theta_full   0.937 
_refine_diff_density_max    0.307 
_refine_diff_density_min   -0.241 
_refine_diff_density_rms    0.059 


data_[Ru(bpy)(CO)3Cl]+[Cl]-.(H5O2)+(Cl)- 
 
_audit_creation_method            SHELXL-97 
_chemical_name_systematic 
; 
 ? 
; 
_chemical_name_common             '[Ru(bpy)(CO)3Cl]+[Cl]-.(H5O2)+(Cl)-'  
_chemical_formula_moiety          ? 
_chemical_formula_sum 
 'C13 H13 Cl3 N2 O5 Ru' 
_chemical_formula_weight          484.67 
 
loop_ 
 _atom_type_symbol 
 _atom_type_description 
 _atom_type_scat_dispersion_real 
 _atom_type_scat_dispersion_imag 
 _atom_type_scat_source 
 'C'  'C'   0.0033   0.0016 
 'International Tables Vol C Tables 4.2.6.8 and 6.1.1.4' 
 'H'  'H'   0.0000   0.0000 
 'International Tables Vol C Tables 4.2.6.8 and 6.1.1.4' 
 'N'  'N'   0.0061   0.0033 
 'International Tables Vol C Tables 4.2.6.8 and 6.1.1.4' 
 'O'  'O'   0.0106   0.0060 
 'International Tables Vol C Tables 4.2.6.8 and 6.1.1.4' 
 'Cl'  'Cl'   0.1484   0.1585 
 'International Tables Vol C Tables 4.2.6.8 and 6.1.1.4' 
 'Ru'  'Ru'  -1.2594   0.8363 
 'International Tables Vol C Tables 4.2.6.8 and 6.1.1.4' 
 
_symmetry_cell_setting            Orthorombic 
_symmetry_space_group_name_H-M    Pbcn 
 
loop_ 
 _symmetry_equiv_pos_as_xyz 
 'x, y, z' 
 '-x+1/2, -y+1/2, z+1/2' 
 '-x, y, -z+1/2' 
 'x+1/2, -y+1/2, -z' 
 '-x, -y, -z' 
 'x-1/2, y-1/2, -z-1/2' 
 'x, -y, z-1/2' 
 '-x-1/2, y-1/2, z' 
 
_cell_length_a                    20.856(4) 
_cell_length_b                    13.523(3) 
_cell_length_c                    13.203(3) 
_cell_angle_alpha                 90.00 
_cell_angle_beta                  90.00 
_cell_angle_gamma                 90.00 
_cell_volume                      3723.7(14) 
_cell_formula_units_Z             8 
_cell_measurement_temperature     293(2) 
_cell_measurement_reflns_used     ? 
_cell_measurement_theta_min       ? 
_cell_measurement_theta_max       ? 
 
_exptl_crystal_description        'rectangular blocks'  
_exptl_crystal_colour             'pale yellow (nearly colourless)'  
_exptl_crystal_size_max           0.3 
_exptl_crystal_size_mid           0.2 
_exptl_crystal_size_min           0.2 
_exptl_crystal_density_meas       ? 
_exptl_crystal_density_diffrn     1.729 
_exptl_crystal_density_method     'not measured' 
_exptl_crystal_F_000              1920 
_exptl_absorpt_coefficient_mu     1.296 
_exptl_absorpt_correction_type    'none' 
_exptl_absorpt_correction_T_min   ? 
_exptl_absorpt_correction_T_max   ? 
 
_exptl_special_details 
; 
 ? 
; 
 
_diffrn_ambient_temperature       293(2) 
_diffrn_radiation_wavelength      0.71073 
_diffrn_radiation_type            MoK\a 
_diffrn_radiation_source          'fine-focus sealed tube' 
_diffrn_radiation_monochromator   graphite 
_diffrn_measurement_device_type   'Nonius Kappa CCD'  
_diffrn_measurement_method        'phi/omega-scans' 
_diffrn_detector_area_resol_mean  ? 
_diffrn_standards_number          ? 
_diffrn_standards_interval_count  ? 
_diffrn_standards_interval_time   ? 
_diffrn_standards_decay_%         ? 
_diffrn_reflns_number             7155 
_diffrn_reflns_av_R_equivalents   0.0107 
_diffrn_reflns_av_sigmaI/netI     0.0291 
_diffrn_reflns_limit_h_min        -25 
_diffrn_reflns_limit_h_max        26 
_diffrn_reflns_limit_k_min        -16 
_diffrn_reflns_limit_k_max        16 
_diffrn_reflns_limit_l_min        -16 
_diffrn_reflns_limit_l_max        16 
_diffrn_reflns_theta_min          4.26 
_diffrn_reflns_theta_max          26.37 
_reflns_number_total              3792 
_reflns_number_gt                 3045 
_reflns_threshold_expression      >2sigma(I) 
 
_computing_data_collection        'kcd (Nonius, 1997)' 
_computing_cell_refinement        'Denzo/Scalepack (Otwinowski, Minor, 1997)'  
_computing_data_reduction         'Denzo/Scalepack (Otwinowski, Minor, 1997)'  
_computing_structure_solution     'SHELXS-97 (Sheldrick, 1990)' 
_computing_structure_refinement   'SHELXL-97 (Sheldrick, 1997)' 
_computing_molecular_graphics     ? 
_computing_publication_material   SHELXL-97 
 
_refine_special_details 
; 
 Refinement of F^2^ against ALL reflections.  The weighted R-factor wR and 
 goodness of fit S are based on F^2^, conventional R-factors R are based 
 on F, with F set to zero for negative F^2^. The threshold expression of 
 F^2^ > 2sigma(F^2^) is used only for calculating R-factors(gt) etc. and is 
 not relevant to the choice of reflections for refinement.  R-factors based 
 on F^2^ are statistically about twice as large as those based on F, and R- 
 factors based on ALL data will be even larger. 
; 
 
_refine_ls_structure_factor_coef  Fsqd  
_refine_ls_matrix_type            full 
_refine_ls_weighting_scheme 
 'calc w=1/[\s^2^(Fo^2^)+(0.0308P)^2^+0.0000P] where P=(Fo^2^+2Fc^2^)/3' 
_atom_sites_solution_primary      direct 
_atom_sites_solution_secondary    difmap 
_atom_sites_solution_hydrogens    geom 
_refine_ls_hydrogen_treatment     mixed 
_refine_ls_extinction_method      SHELXL 
_refine_ls_extinction_coef        0.00121(15) 
_refine_ls_extinction_expression 
 'Fc^*^=kFc[1+0.001xFc^2^\l^3^/sin(2\q)]^-1/4^' 
_refine_ls_number_reflns          3792 
_refine_ls_number_parameters      270 
_refine_ls_number_restraints      0 
_refine_ls_R_factor_all           0.0251 
_refine_ls_R_factor_gt            0.0203 
_refine_ls_wR_factor_ref          0.0505 
_refine_ls_wR_factor_gt           0.0498 
_refine_ls_goodness_of_fit_ref    0.934 
_refine_ls_restrained_S_all       0.934 
_refine_ls_shift/su_max           0.007 
_refine_ls_shift/su_mean          0.000 
 
loop_ 
 _atom_site_label 
 _atom_site_type_symbol 
 _atom_site_fract_x 
 _atom_site_fract_y 
 _atom_site_fract_z 
 _atom_site_U_iso_or_equiv 
 _atom_site_adp_type 
 _atom_site_occupancy 
 _atom_site_calc_flag 
 _atom_site_refinement_flags 
 _atom_site_disorder_assembly 
 _atom_site_disorder_group 
Ru Ru 0.415802(6) 0.229755(10) 0.016357(11) 0.03254(6) Uani 1 d . . . 
Cl1 Cl 0.42430(2) 0.31162(4) -0.14327(4) 0.05097(13) Uani 1 d . . . 
C1 C 0.44676(9) 0.11346(14) -0.05402(16) 0.0447(4) Uani 1 d . . . 
O1 O 0.46681(7) 0.05093(11) -0.09984(13) 0.0679(4) Uani 1 d . . . 
C2 C 0.32880(9) 0.19261(13) -0.01636(13) 0.0385(4) Uani 1 d . . . 
O2 O 0.27778(6) 0.17619(10) -0.03734(10) 0.0512(3) Uani 1 d . . . 
C3 C 0.41286(8) 0.16262(14) 0.14427(15) 0.0425(4) Uani 1 d . . . 
O3 O 0.41572(7) 0.12238(12) 0.21879(12) 0.0653(4) Uani 1 d . . . 
N1 N 0.39224(6) 0.36877(10) 0.07700(10) 0.0339(3) Uani 1 d . . . 
N2 N 0.50649(6) 0.28660(10) 0.05551(11) 0.0352(3) Uani 1 d . . . 
C19 C 0.56233(9) 0.23891(15) 0.04646(17) 0.0456(4) Uani 1 d . . . 
C18 C 0.61961(9) 0.28035(16) 0.07718(17) 0.0501(5) Uani 1 d . . . 
C17 C 0.61997(9) 0.37321(16) 0.11685(15) 0.0486(5) Uani 1 d . . . 
C16 C 0.56267(9) 0.42390(14) 0.12479(14) 0.0408(4) Uani 1 d . . . 
C15 C 0.50617(7) 0.37913(12) 0.09451(12) 0.0331(4) Uani 1 d . . . 
C14 C 0.44294(8) 0.42696(12) 0.10278(12) 0.0327(4) Uani 1 d . . . 
C13 C 0.43392(9) 0.52338(14) 0.13437(13) 0.0383(4) Uani 1 d . . . 
C12 C 0.37281(9) 0.56197(14) 0.13976(14) 0.0425(4) Uani 1 d . . . 
C11 C 0.32197(9) 0.50351(14) 0.11266(14) 0.0425(4) Uani 1 d . . . 
C10 C 0.33280(8) 0.40799(14) 0.08204(14) 0.0411(4) Uani 1 d . . . 
H19 H 0.5598(10) 0.1767(18) 0.0230(16) 0.056(6) Uiso 1 d . . . 
H18 H 0.6532(11) 0.2454(16) 0.0659(19) 0.064(7) Uiso 1 d . . . 
H17 H 0.6611(9) 0.4072(15) 0.1389(15) 0.058(6) Uiso 1 d . . . 
H16 H 0.5613(8) 0.4860(14) 0.1509(13) 0.039(5) Uiso 1 d . . . 
H13 H 0.4665(8) 0.5601(12) 0.1484(12) 0.031(5) Uiso 1 d . . . 
H12 H 0.3678(9) 0.6221(14) 0.1610(14) 0.045(5) Uiso 1 d . . . 
H11 H 0.2835(9) 0.5236(14) 0.1146(14) 0.044(5) Uiso 1 d . . . 
H10 H 0.2998(8) 0.3653(14) 0.0656(14) 0.041(5) Uiso 1 d . . . 
O14 O 0.31916(8) -0.10607(12) 0.24906(13) 0.0579(4) Uani 1 d . . . 
O15 O 0.26457(9) 0.02670(13) 0.34322(14) 0.0630(4) Uani 1 d . . . 
H152 H 0.2933(13) 0.038(2) 0.401(2) 0.102(10) Uiso 1 d . . . 
H151 H 0.2631(12) 0.079(2) 0.3157(19) 0.075(9) Uiso 1 d . . . 
H142 H 0.2886(14) -0.159(2) 0.241(2) 0.110(10) Uiso 1 d . . . 
H141 H 0.3291(12) -0.083(2) 0.182(2) 0.097(9) Uiso 1 d . . . 
H145 H 0.2931(16) -0.034(3) 0.299(3) 0.142(12) Uiso 1 d . . . 
Cl5 Cl 0.34405(2) -0.04558(4) 0.03844(4) 0.05165(13) Uani 1 d . . . 
Cl6 Cl 0.26287(3) 0.21961(4) 0.22258(4) 0.05437(14) Uani 1 d . . . 
 
loop_ 
 _atom_site_aniso_label 
 _atom_site_aniso_U_11 
 _atom_site_aniso_U_22 
 _atom_site_aniso_U_33 
 _atom_site_aniso_U_23 
 _atom_site_aniso_U_13 
 _atom_site_aniso_U_12 
Ru 0.03129(9) 0.02776(9) 0.03855(10) -0.00132(6) -0.00128(5) -0.00131(5) 
Cl1 0.0624(3) 0.0469(3) 0.0436(3) 0.0066(2) -0.0038(2) -0.0122(2) 
C1 0.0405(10) 0.0394(10) 0.0541(11) 0.0001(9) 0.0013(9) -0.0049(8) 
O1 0.0689(10) 0.0517(9) 0.0830(11) -0.0226(8) 0.0177(8) 0.0049(7) 
C2 0.0426(10) 0.0325(9) 0.0402(10) -0.0010(7) 0.0005(8) -0.0003(8) 
O2 0.0385(7) 0.0558(9) 0.0593(9) -0.0047(7) -0.0087(6) -0.0061(6) 
C3 0.0388(10) 0.0380(10) 0.0506(12) -0.0016(9) -0.0022(8) 0.0006(8) 
O3 0.0770(11) 0.0678(10) 0.0512(9) 0.0145(8) -0.0043(7) 0.0081(8) 
N1 0.0323(7) 0.0310(7) 0.0383(8) -0.0009(6) -0.0002(6) 0.0000(6) 
N2 0.0303(7) 0.0332(8) 0.0419(8) -0.0017(6) -0.0019(6) 0.0005(6) 
C19 0.0374(10) 0.0378(11) 0.0617(13) -0.0041(10) -0.0015(9) 0.0039(8) 
C18 0.0328(10) 0.0515(13) 0.0660(14) -0.0005(10) -0.0033(9) 0.0052(9) 
C17 0.0351(10) 0.0558(12) 0.0550(12) 0.0011(10) -0.0074(9) -0.0049(9) 
C16 0.0404(10) 0.0407(11) 0.0414(10) -0.0049(8) -0.0044(8) -0.0042(8) 
C15 0.0331(8) 0.0366(9) 0.0295(8) 0.0008(7) -0.0016(7) -0.0019(7) 
C14 0.0340(9) 0.0346(9) 0.0293(8) -0.0007(7) -0.0003(7) -0.0015(7) 
C13 0.0405(10) 0.0369(10) 0.0374(10) -0.0047(8) -0.0033(8) -0.0045(8) 
C12 0.0525(12) 0.0341(10) 0.0410(11) -0.0059(8) 0.0023(8) 0.0063(9) 
C11 0.0380(10) 0.0426(10) 0.0469(11) -0.0008(9) 0.0035(8) 0.0096(8) 
C10 0.0327(9) 0.0396(10) 0.0509(11) -0.0015(9) 0.0004(8) -0.0008(8) 
O14 0.0715(10) 0.0513(9) 0.0509(9) 0.0059(7) -0.0009(8) -0.0094(8) 
O15 0.0881(12) 0.0446(9) 0.0562(10) 0.0055(8) -0.0083(9) -0.0009(8) 
Cl5 0.0567(3) 0.0458(3) 0.0525(3) 0.0022(2) 0.0080(2) 0.0036(2) 
Cl6 0.0620(3) 0.0419(3) 0.0592(3) 0.0025(2) -0.0003(2) 0.0008(2) 
 
_geom_special_details 
; 
 All esds (except the esd in the dihedral angle between two l.s. planes) 
 are estimated using the full covariance matrix.  The cell esds are taken 
 into account individually in the estimation of esds in distances, angles 
 and torsion angles; correlations between esds in cell parameters are only 
 used when they are defined by crystal symmetry.  An approximate (isotropic) 
 treatment of cell esds is used for estimating esds involving l.s. planes. 
; 
 
loop_ 
 _geom_bond_atom_site_label_1 
 _geom_bond_atom_site_label_2 
 _geom_bond_distance 
 _geom_bond_site_symmetry_2 
 _geom_bond_publ_flag 
Ru C3 1.918(2) . ? 
Ru C2 1.9317(19) . ? 
Ru C1 1.937(2) . ? 
Ru N1 2.1015(14) . ? 
Ru N2 2.1062(14) . ? 
Ru Cl1 2.3872(7) . ? 
C1 O1 1.121(2) . ? 
C2 O2 1.122(2) . ? 
C3 O3 1.126(2) . ? 
N1 C10 1.350(2) . ? 
N1 C14 1.361(2) . ? 
N2 C19 1.337(2) . ? 
N2 C15 1.353(2) . ? 
C19 C18 1.380(3) . ? 
C19 H19 0.90(2) . ? 
C18 C17 1.361(3) . ? 
C18 H18 0.86(2) . ? 
C17 C16 1.382(3) . ? 
C17 H17 1.016(19) . ? 
C16 C15 1.384(2) . ? 
C16 H16 0.909(18) . ? 
C15 C14 1.473(2) . ? 
C14 C13 1.382(2) . ? 
C13 C12 1.379(3) . ? 
C13 H13 0.861(16) . ? 
C12 C11 1.370(3) . ? 
C12 H12 0.866(19) . ? 
C11 C10 1.372(3) . ? 
C11 H11 0.848(18) . ? 
C10 H10 0.924(18) . ? 
O14 H142 0.97(3) . ? 
O14 H141 0.97(3) . ? 
O14 H145 1.30(4) . ? 
O15 H152 0.99(3) . ? 
O15 H151 0.79(3) . ? 
O15 H145 1.17(4) . ? 
 
loop_ 
 _geom_angle_atom_site_label_1 
 _geom_angle_atom_site_label_2 
 _geom_angle_atom_site_label_3 
 _geom_angle 
 _geom_angle_site_symmetry_1 
 _geom_angle_site_symmetry_3 
 _geom_angle_publ_flag 
C3 Ru C2 92.51(7) . . ? 
C3 Ru C1 92.79(8) . . ? 
C2 Ru C1 89.70(7) . . ? 
C3 Ru N1 94.61(7) . . ? 
C2 Ru N1 95.63(6) . . ? 
C1 Ru N1 170.67(7) . . ? 
C3 Ru N2 89.16(7) . . ? 
C2 Ru N2 173.41(7) . . ? 
C1 Ru N2 96.59(6) . . ? 
N1 Ru N2 77.87(5) . . ? 
C3 Ru Cl1 177.52(5) . . ? 
C2 Ru Cl1 89.59(5) . . ? 
C1 Ru Cl1 85.89(6) . . ? 
N1 Ru Cl1 86.50(4) . . ? 
N2 Ru Cl1 88.90(4) . . ? 
O1 C1 Ru 174.72(17) . . ? 
O2 C2 Ru 176.17(17) . . ? 
O3 C3 Ru 175.07(16) . . ? 
C10 N1 C14 118.29(14) . . ? 
C10 N1 Ru 125.79(11) . . ? 
C14 N1 Ru 115.51(10) . . ? 
C19 N2 C15 118.99(15) . . ? 
C19 N2 Ru 125.76(12) . . ? 
C15 N2 Ru 115.24(10) . . ? 
N2 C19 C18 122.12(19) . . ? 
N2 C19 H19 115.6(13) . . ? 
C18 C19 H19 122.2(13) . . ? 
C17 C18 C19 119.52(19) . . ? 
C17 C18 H18 124.8(16) . . ? 
C19 C18 H18 115.6(16) . . ? 
C18 C17 C16 118.83(18) . . ? 
C18 C17 H17 122.2(11) . . ? 
C16 C17 H17 118.9(11) . . ? 
C17 C16 C15 119.84(18) . . ? 
C17 C16 H16 120.9(11) . . ? 
C15 C16 H16 119.2(11) . . ? 
N2 C15 C16 120.68(15) . . ? 
N2 C15 C14 116.02(14) . . ? 
C16 C15 C14 123.29(15) . . ? 
N1 C14 C13 121.01(15) . . ? 
N1 C14 C15 115.03(14) . . ? 
C13 C14 C15 123.96(15) . . ? 
C12 C13 C14 119.90(17) . . ? 
C12 C13 H13 119.9(11) . . ? 
C14 C13 H13 120.1(11) . . ? 
C11 C12 C13 118.90(18) . . ? 
C11 C12 H12 122.2(12) . . ? 
C13 C12 H12 118.9(12) . . ? 
C12 C11 C10 119.53(18) . . ? 
C12 C11 H11 122.7(13) . . ? 
C10 C11 H11 117.8(13) . . ? 
N1 C10 C11 122.37(17) . . ? 
N1 C10 H10 115.3(11) . . ? 
C11 C10 H10 122.3(11) . . ? 
H142 O14 H141 106(2) . . ? 
H142 O14 H145 110(2) . . ? 
H141 O14 H145 108(2) . . ? 
H152 O15 H151 104(2) . . ? 
H152 O15 H145 101(2) . . ? 
H151 O15 H145 114(2) . . ? 
 
loop_ 
 _geom_torsion_atom_site_label_1 
 _geom_torsion_atom_site_label_2 
 _geom_torsion_atom_site_label_3 
 _geom_torsion_atom_site_label_4 
 _geom_torsion 
 _geom_torsion_site_symmetry_1 
 _geom_torsion_site_symmetry_2 
 _geom_torsion_site_symmetry_3 
 _geom_torsion_site_symmetry_4 
 _geom_torsion_publ_flag 
C3 Ru C1 O1 -153(2) . . . . ? 
C2 Ru C1 O1 115(2) . . . . ? 
N1 Ru C1 O1 -10(2) . . . . ? 
N2 Ru C1 O1 -63(2) . . . . ? 
Cl1 Ru C1 O1 25(2) . . . . ? 
C3 Ru C2 O2 138(2) . . . . ? 
C1 Ru C2 O2 -129(2) . . . . ? 
N1 Ru C2 O2 43(2) . . . . ? 
N2 Ru C2 O2 33(3) . . . . ? 
Cl1 Ru C2 O2 -43(2) . . . . ? 
C2 Ru C3 O3 152(2) . . . . ? 
C1 Ru C3 O3 63(2) . . . . ? 
N1 Ru C3 O3 -112(2) . . . . ? 
N2 Ru C3 O3 -34(2) . . . . ? 
Cl1 Ru C3 O3 5(3) . . . . ? 
C3 Ru N1 C10 -94.69(15) . . . . ? 
C2 Ru N1 C10 -1.70(15) . . . . ? 
C1 Ru N1 C10 122.9(4) . . . . ? 
N2 Ru N1 C10 177.16(15) . . . . ? 
Cl1 Ru N1 C10 87.54(14) . . . . ? 
C3 Ru N1 C14 92.78(12) . . . . ? 
C2 Ru N1 C14 -174.23(12) . . . . ? 
C1 Ru N1 C14 -49.6(5) . . . . ? 
N2 Ru N1 C14 4.63(11) . . . . ? 
Cl1 Ru N1 C14 -84.99(11) . . . . ? 
C3 Ru N2 C19 81.98(17) . . . . ? 
C2 Ru N2 C19 -173.2(5) . . . . ? 
C1 Ru N2 C19 -10.73(18) . . . . ? 
N1 Ru N2 C19 176.88(17) . . . . ? 
Cl1 Ru N2 C19 -96.47(17) . . . . ? 
C3 Ru N2 C15 -96.90(13) . . . . ? 
C2 Ru N2 C15 7.9(6) . . . . ? 
C1 Ru N2 C15 170.38(13) . . . . ? 
N1 Ru N2 C15 -2.00(12) . . . . ? 
Cl1 Ru N2 C15 84.65(12) . . . . ? 
C15 N2 C19 C18 1.1(3) . . . . ? 
Ru N2 C19 C18 -177.74(16) . . . . ? 
N2 C19 C18 C17 -0.9(3) . . . . ? 
C19 C18 C17 C16 -0.4(3) . . . . ? 
C18 C17 C16 C15 1.3(3) . . . . ? 
C19 N2 C15 C16 -0.1(3) . . . . ? 
Ru N2 C15 C16 178.87(13) . . . . ? 
C19 N2 C15 C14 -179.67(16) . . . . ? 
Ru N2 C15 C14 -0.71(19) . . . . ? 
C17 C16 C15 N2 -1.1(3) . . . . ? 
C17 C16 C15 C14 178.43(17) . . . . ? 
C10 N1 C14 C13 0.7(2) . . . . ? 
Ru N1 C14 C13 173.81(13) . . . . ? 
C10 N1 C14 C15 -179.51(15) . . . . ? 
Ru N1 C14 C15 -6.39(18) . . . . ? 
N2 C15 C14 N1 4.7(2) . . . . ? 
C16 C15 C14 N1 -174.85(16) . . . . ? 
N2 C15 C14 C13 -175.50(16) . . . . ? 
C16 C15 C14 C13 4.9(3) . . . . ? 
N1 C14 C13 C12 -0.2(3) . . . . ? 
C15 C14 C13 C12 179.99(16) . . . . ? 
C14 C13 C12 C11 -0.5(3) . . . . ? 
C13 C12 C11 C10 0.7(3) . . . . ? 
C14 N1 C10 C11 -0.4(3) . . . . ? 
Ru N1 C10 C11 -172.77(14) . . . . ? 
C12 C11 C10 N1 -0.3(3) . . . . ? 
 
_diffrn_measured_fraction_theta_max    0.892 
_diffrn_reflns_theta_full              26.37 
_diffrn_measured_fraction_theta_full   0.892 
_refine_diff_density_max    0.484 
_refine_diff_density_min   -0.400 
_refine_diff_density_rms    0.049 
